# Supplementary material for: Late-replicating heterochromatin is characterized by decreased cytosine methylation in the human genome
Source: HighWire-hosted journal article supplement (doi:10.1101/gr.116509.110), 2011-09-28
Supplement: Supple_table2011June.xlsx [file Supple_table2011June.xlsx]

## Sheet: Microarray summary
Microarray summary.
	Min.	1st Qu.	Median	Mean	3rd Qu.	Max.
Gene length	241	8622	23320	58793	60610	2304635
HpaII site per gene	1	8	16	29.86	33	1403
Expression (GM06990)	2.872	4.039	6.057	6.125	7.967	10.995
Expression (Fibroblast)	2.855	4.014	6.283	6.205	8.012	11.007
Methylation (GM06990)	-3.116	-0.3851	0.2962	0.3401	0.777	2.4911
Methylation (Fibroblast)	-2.4597	-0.3851	0.1122	0.2523	0.8761	2.8287
HpaII sites frequency
	Min.	1st Qu.	Median	Mean	3rd Qu.	Max.
All refseq genes	0.01133	0.3489	0.7792	1.14	1.587	23.17
Highly expressed in Fibroblast	0.02164	0.373	0.73872	1.06058	1.45384	19.6956
Highly expressed in GM06990	0.02164	0.36176	0.73599	1.05585	1.48391	19.6956
Methylation and expression summary
Promoter region
Methylation status	Expression
	GM06990		Fibroblast
	High	Low	High	Low
Hypomethylated	7455	7568	7650	6756
Hypermethylated	680	739	921	1115
Gene bodies
Methylation status	Expression
	GM06990		Fibroblast
	High	Low	High	Low
Hypomethylated	1828	5554	1267	4363
Hypermethylated	6211	1905	7252	2616

## Sheet: Supplementary table 1
Supplementary table 1: Bisulphite PCR primer information
Assay name		Forward PCR primer	Tm	Chromosome position (UCSC assembly hg18)
ANPEP_PRO1	F	TATGAAGATTTTAGGAGTTTGGGAG	58	chr15:88,156,354-88,156,753
	R	AAAAAACAACTTCCCATTAAAACCT
ANPEP_Pro	F	TAAGGTGTGATTGGGATTATTGTAG	57	chr15:88,157,264-88,157,647
	R	CCCAAAACCTTCTAAAAAATAAAAC
ANPEP_GB1	F	ATTTTTATGGTTGGTTTAGGGTGTAG	59.5	chr15:88,147,644-88,147,984
	R	AATAAATACACTAACCTCCTCCCAC
ANPEP_GB2	F	GATTTTAATAGGATGGTTGTGGAG	56.5	chr15:88,147,432-88,147,830
	R	AAAAAACCTCACTAAAAACAAAATCT
ANPEP_3_1	F	TTTGTAGGTAGATATGGAGGTATAGG	57.5	chr15:88,128,941-88,129,323
	R	AACTAATCTCAAAAAAACCCAACTC
ANPEP_3_2	F	GGATATATGTGGGTATTTTGTATGG	56	chr15:88,129,532-88,129,963
	R	AAAATCTCCCTAAACCAAATTTTAC
BLNK_Pro_1	F	GGGTGGGGAAAATTTTATTTTAATTTTTG	58.5	chr10:98,021,081-98,021,393
	R	TCACCAAACTAACTAACTATCCAAATC
BLNK_Pro_2	F	AAATATTTTTTGAATAGAGGGGAATATTA	56	chr10:98,020,166-98,020,609
	R	AATCTATCTTTCCAATACCCTCATATC
BLNK_GB_1	F	TGAGGGGTATAGATTTAGTATTGATATTT	57	chr10:97,973,339-97,973,788
	R	AAAAATAATCCAAAACCTCTTTTATATTA
BLNK_GB_2	F	AAAAGAGGTTTTGGATTATTTTTTG	57.5	chr10:97,973,766-97,974,205
	R	ATAATCACCACCTAAATACACTTTAACAT
TLN1_Pro_1	F	TTTTTTTGGGTAAAAAGAAGTTTTT	55	chr9:35,721,126-35,721,574
	R	AAATCAACAAACAACAAAAATCAAAT
TLN1_Pro_3	F	AAGGAAGTTAAGGGAGTTTTTGAGTAG	60	chr9:35,719,492-35,719,944
	R	CATTCCCAACCTAATACAATCACTAAC
TLN1_GB_1	F	GGAATAAGAAGGGATTGAAGATTTT	59.5	chr9:35,715,507-35,715,804
	R	CTTCCCTTAAACTCCACCATCTAA
TLN1_GB_2	F	TGTTTGGAGAGTATAGGGTAAGGAG	60	chr9:35,714,074-35,714,386
	R	CAAACAACACAAAAACCATAAAAATT
T7 primer tag:
5’- AGGAAGAGAG[gene-specific forward primer] -3’
5’- CAGTAATACGACTCACTATAGGGAGAAGGCT[gene-specific reverse primer] -3’

## Sheet: Supplementary table 2
Supplementary table 2: Quantitative RT PCR primer information
GeneID	Accession #	Forward primer	Revers primer
PLCG2	NM_002661	CAGACTATGGAGGAGGAAGTGC	CCGTCTCCATGCAGTATTCC
BLNK	NM_001114094	CCTCCAGTAGAGCAGGAAACC	GGGAAGTGTCTTGCTGAAGG
TIMP	NM_003255	GGACGTTGGAGGAAAGAAGG	GGTTCAGGCTCTTCTTCTGG
USB36	NM_025090.3	AAGAAGAACATCGGCAATGG	GCACACCAATCTCTTCAGTGG
ANPEP	NM_001150	AGATCCCAGAAAACCTGATGG	GACCATCTCCTCACACTCTGG
SND1	NM_014390	GACTATGTGGCTCCCACAGC	TTCACAACAATGGCATCAGC
TLN1	NM_006289	ACAATGAGCAGAAGCACAAGG	GCCTCAATCTCACTCATCTGC
GAPDH	NM_002046	CCACATCGCTCAGACACCAT	CCAGGCGCCCAATACG

## Sheet: Supplementary table 3
Supplementary table 3: Bisulphite Massarray data
ANPEP region (chr15)					BLNK region (Chr10)					TLN1 region (chr9)
Assay name*	Position**	GM06990	Fibroblast		Assay name*	Position**	GM06990	Fibroblast		Assay name*	Position**	GM06990	Fibroblast
ANPEP_PRO1	88156389	0.57	0.2		BLNK_Pro_1	98021115	0.005	0.2		TLN1_Pro_1	35721326	0.2425	0.025
	88156406, 88156412	0.34	0.21			98021121	0.1	0.75			35721484	0.025	0.095
	88156446	0.045	0.055			98021170				TLN1_Pro_3	35719533	0.415	1
	88156567	NA	0.04			98021191	0	0.005			35719624	0.285	0.9875
	88156617	0.785	NA			98021251	0.01	0.45			35719755	0	0.0075
	88156655	0.48	0.03			98021327	0.025	0.055			35719779	0.0025	0
ANPEP_Pro	88157309	1	0.975		BLNK_Pro_2	98020200	0.02	0.215			35719844	0.0025	0
	88157321	0.695	1			98020270	0.02	0.145		TLN1_GB_1	35715544	0.94	0.545
	88,157,375, 88,157,382	0.975	0.285			98020521	0.565	0.89			35715588	0.935	0.93
	88157503	0.765	0.64			98020533	0.005	0.585			35715603	0.965	0.96
	88157605	0.755	0.345		BLNK_GB_1	97973498	0.92	0.155			35,715,610, 35,715,613	0.975	0.985
	88157611	0.725	0.38			97973635	0.97	0.4			35715629	0.925	0.895
ANPEP_GB1	88147677	0.96	1		BLNK_GB_2	97973827	0.715	0.19			35715644	0.925	0.905
	88147697, 88,147,703	0.79	0.975			97973856	0.58	0		TLN1_GB_2	35714100	0.825	0.955
	88147739	0.725	0.995			97973941	1	0.05			35714142	0.855	0.98
	88147763	0.24	0.98			97973964	0.93	0.275			35714262	0.995	0.925
	88147856	0.24	0.61			97974121	0.69	0.005			35,714,273, 35,714,278	0.99	0.99
	88147872	0.555	0.93			97974134	0.89	0.04			35714310	0.93	0.945
	88147899	0.845	0.925
	88147924, 88,147,927	0.99	1
	88147939	0.93	0.86
	88147944	0.915	0.96
	88147957	0.895	0.91
ANPEP_GB2	88147551	0.46	0.825
	88147613	0.02	0.79
	88147624	0.015	0.735
	88147677	0.905	0.975
	88147697, 88,147,703	0.77	0.89
	88147739	0.65	0.94
	88147763	0.215	0.955
ANPEP_3_1	88128967	0.645	0.975
	88128990	0.105	0.74
	88129040, 88,129,048	0.435	0.78
	88129072	0.04	0.865
	88129243	0.31	0.925
	88129259	0.54	0.995
ANPEP_3_2	88129561	0.775	0.805
	88129656	0.825	1
	88129684	0.915	0.89
	88129697	0.915	0.31
	88129765	0.185	0.235
	88129877	0.37	0.51
	88129892	0.89	0.93
Assay name*	See supplementary table1
Position**	Chromosome position (UCSC assembly hg18)
Pro	Promoter
GB	Gene body

## Sheet: Supplementary_table4
Supplementary table 4: Candidate replicate origins in fibroblasts
human fibroblast															*; averaged in CGI
refseq_id	chr	strand	txStart	txEnd	CGI_start	CGI_end	CGI_length	Number of CpG	Number of G+C	CpG percentage	G+C percentage	Obs/exp	Average methylation*	Average replication*	Expression status
NM_198317	chr1	+	885829	890958	884176	892517	8341	615	5505	14.7	66	0.68	-0.531825	82.6667	6.10701
NM_198576	chr1	+	945365	981355	965359	970168	4809	351	3126	14.6	65	0.69	-0.652592	77.875	9.43097
NM_198576	chr1	+	945365	981355	973037	973475	438	32	307	14.6	70.1	0.62	-0.558924	78	9.43097
NM_198576	chr1	+	945365	981355	980137	980557	420	29	276	13.8	65.7	0.64	-0.0247199	78	9.43097
NM_016176	chr1	-	1142150	1157310	1143647	1144282	635	44	417	13.9	65.7	0.65	-0.153332	81	9.66829
NM_016547	chr1	-	1142150	1157310	1143647	1144282	635	44	417	13.9	65.7	0.65	-0.153332	81	9.48744
NM_016176	chr1	-	1142150	1157310	1151822	1152144	322	24	213	14.9	66.1	0.69	-0.0829978	79	9.66829
NM_016547	chr1	-	1142150	1157310	1151822	1152144	322	24	213	14.9	66.1	0.69	-0.0829978	79	9.48744
NM_016176	chr1	-	1142150	1157310	1153365	1153758	393	34	277	17.3	70.5	0.7	-0.428452	78	9.66829
NM_016547	chr1	-	1142150	1157310	1153365	1153758	393	34	277	17.3	70.5	0.7	-0.428452	78	9.48744
NM_058167	chr1	-	1179154	1199097	1179259	1180108	849	68	567	16	66.8	0.72	-1.49171	78	6.39909
NM_058167	chr1	-	1179154	1199097	1193029	1193460	431	31	274	14.4	63.6	0.72	-0.138492	78	6.39909
NM_017871	chr1	-	1236827	1249909	1237781	1238356	575	41	393	14.3	68.3	0.63	-0.390994	81	8.16031
NM_001029885	chr1	+	1250005	1254139	1252528	1253283	755	66	525	17.5	69.5	0.73	-0.240576	82	6.08456
NM_031921	chr1	+	1397026	1421445	1403897	1404395	498	40	340	16.1	68.3	0.69	-0.72761	78	7.47193
NM_031921	chr1	+	1397026	1421445	1407148	1407616	468	42	327	17.9	69.9	0.76	-0.353342	78	7.47193
NM_031921	chr1	+	1397026	1421445	1410089	1410547	458	34	314	14.8	68.6	0.63	-0.244404	78	7.47193
NM_018188	chr1	+	1437385	1459930	1442564	1443062	498	40	340	16.1	68.3	0.69	-0.160171	78	7.84695
NM_018188	chr1	+	1437385	1459930	1445165	1445755	590	48	408	16.3	69.2	0.69	-0.155994	79	7.84695
NM_018188	chr1	+	1437385	1459930	1447817	1448892	1075	77	721	14.3	67.1	0.64	-0.506162	79	7.84695
NM_080875	chr1	+	1540657	1555853	1548450	1549222	772	73	552	18.9	71.5	0.74	-0.143881	80	6.59898
NM_080875	chr1	+	1540657	1555853	1551912	1552261	349	30	243	17.2	69.6	0.71	-0.7998	80	6.59898
NM_023018	chr1	-	1672530	1699769	1675233	1675831	598	48	401	16.1	67.1	0.72	-0.943911	80	8.55736
NM_003036	chr1	+	2149993	2231511	2226302	2228929	2627	206	1718	15.7	65.4	0.73	-0.926079	80	8.80555
NM_007033	chr1	+	2313073	2326741	2323410	2324032	622	43	390	13.8	62.7	0.72	-0.141277	83	9.43535
NM_014851	chr1	-	6573370	6585516	6581712	6582092	380	27	246	14.2	64.7	0.68	-0.377794	83	8.34515
NM_012102	chr1	-	8335050	8800286	8340909	8341444	535	43	364	16.1	68	0.72	-0.64511	83	8.66203
NM_025106	chr1	+	9275527	9352175	9350094	9350321	227	22	159	19.4	70	0.8	-0.763079	84	6.50046
NM_001009566	chr1	-	9711665	9807137	9712879	9713291	412	32	272	15.5	66	0.72	-0.810855	82	9.16822
NM_001009566	chr1	-	9711665	9807137	9745163	9745404	241	19	161	15.8	66.8	0.73	-0.59985	84	9.16822
NM_003443	chr1	-	16140950	16175214	16143178	16144169	991	82	678	16.5	68.4	0.71	-0.516823	85	6.5563
NM_020816	chr1	-	20863093	20916904	20903595	20903956	361	34	235	18.8	65.1	0.89	-0.922199	78	6.41057
NM_001397	chr1	-	21416326	21489569	21424161	21424518	357	32	227	17.9	63.6	0.89	-0.577375	80	10.0937
NM_005529	chr1	-	22021323	22136337	22083579	22083905	326	25	225	15.3	69	0.64	-0.216658	84	9.06258
NM_004672	chr1	-	27554256	27565924	27559611	27560330	719	72	504	20	70.1	0.84	-0.0480363	79	6.07238
NM_018207	chr1	-	33383590	33420258	33385563	33385908	345	26	220	15.1	63.8	0.74	-0.19534	85	7.19838
NM_018207	chr1	-	33383590	33420258	33397846	33398114	268	24	184	17.9	68.7	0.76	-0.504674	84	7.19838
NM_152493	chr1	+	33494760	33538907	33514361	33514968	607	49	405	16.1	66.7	0.73	-0.443918	83.5	8.95371
NM_152493	chr1	+	33494760	33538907	33518328	33518577	249	20	170	16.1	68.3	0.73	-0.819383	83	8.95371
NM_018067	chr1	+	36394389	36419028	36414343	36415048	705	73	485	20.7	68.8	0.88	-0.0443967	79	9.49114
NM_002840	chr1	+	43769133	43861930	43836056	43836344	288	30	205	20.8	71.2	0.85	-0.0528316	83	9.04018
NM_145279	chr1	-	46845973	46853392	46851167	46851554	387	39	247	20.2	63.8	0.99	-0.0906547	82	8.07506
NM_153703	chr1	+	53300472	53323762	53316692	53317271	579	43	382	14.9	66	0.69	-0.195298	85	9.34392
NM_001018054	chr1	-	53483804	53566314	53514885	53515433	548	83	410	30.3	74.8	1.08	-0.340854	86	7.05913
NM_001009955	chr1	-	54464782	54644680	54496284	54496607	323	27	205	16.7	63.5	0.9	-0.329408	81	9.38777
NM_018070	chr1	-	54464782	54644567	54496284	54496607	323	27	205	16.7	63.5	0.9	-0.329408	81	9.28866
NM_145716	chr1	-	54464782	54644567	54496284	54496607	323	27	205	16.7	63.5	0.9	-0.329408	81	9.20725
NM_001408	chr1	+	109594163	109619901	109602577	109603223	646	65	426	20.1	65.9	0.95	-0.0953031	85	6.06699
NM_003993	chr1	-	153499282	153509905	153505902	153506118	216	21	127	19.4	58.8	1.13	-0.120616	80	8.40061
NM_021958	chr1	+	219119365	219125023	219124086	219124380	294	24	192	16.3	65.3	0.78	-0.232279	84	7.49545
NM_002221	chr1	-	224886013	224993499	224896205	224896426	221	15	145	13.6	65.6	0.64	-0.769132	75	7.02882
NM_014801	chr1	-	231186504	231498082	231188550	231188759	209	18	143	17.2	68.4	0.78	-0.231766	66	6.28041
NM_002924	chr1	-	239005439	239587101	239053277	239053532	255	29	185	22.7	72.5	0.87	-0.132875	74	7.58945
NM_024836	chr1	+	247099152	247110337	247108186	247109419	1233	145	854	23.5	69.3	0.99	-0.323704	71	8.35612
NM_014974	chr10	-	310131	725608	455928	456396	468	40	284	17.1	60.7	0.93	-0.408401	69	7.3023
NM_014974	chr10	-	310131	725608	508192	508471	279	23	178	16.5	63.8	0.81	-1.10184	77	7.3023
NM_014974	chr10	-	310131	725608	520713	521099	386	31	228	16.1	59.1	0.93	-0.019847	77	7.3023
NM_014974	chr10	-	310131	725608	668262	669515	1253	96	776	15.3	61.9	0.8	-0.487639	78.8	7.3023
NM_014974	chr10	-	310131	725608	675844	676202	358	31	244	17.3	68.2	0.81	-1.55049	82	7.3023
NM_014974	chr10	-	310131	725608	701896	702395	499	34	287	13.6	57.5	0.82	-1.35442	80	7.3023
NM_002627	chr10	+	3099751	3168996	3150888	3151107	219	24	134	21.9	61.2	1.18	-0.657051	76	9.43149
NM_018027	chr10	-	13725711	14412872	13738568	13739546	978	97	642	19.8	65.6	0.92	-0.0523148	76	7.22696
NM_004273	chr10	+	73394125	73443327	73437162	73438385	1223	122	845	20	69.1	0.84	-0.367492	86	9.08178
NM_032772	chr10	-	76827610	76831519	76825134	76839606	14472	987	8510	13.6	58.8	0.79	-0.101292	73	6.76837
NM_020338	chr10	+	80498797	80746291	80672115	80673693	1578	139	876	17.6	55.5	1.15	-0.215175	84	8.38851
NM_033397	chr10	-	106061888	106083653	106064955	106065358	403	27	262	13.4	65	0.63	-0.928315	82	7.43945
NM_003750	chr10	-	120784530	120830324	120791651	120792216	565	39	343	13.8	60.7	0.81	-0.438145	81	7.4348
NM_014937	chr10	+	121475598	121578649	121567519	121568375	856	78	555	18.2	64.8	0.87	-0.0466393	85	7.493
NM_001329	chr10	-	126666407	126839093	126676541	126676882	341	26	221	15.2	64.8	0.73	-0.16231	83	9.61744
NM_001329	chr10	-	126666407	126839093	126829781	126831024	1243	106	855	17.1	68.8	0.72	-0.353574	66	9.61744
NM_005539	chr10	+	134201342	134446974	134354410	134355581	1171	99	700	16.9	59.8	0.97	-1.05391	68.1667	8.78676
NM_005539	chr10	+	134201342	134446974	134377732	134378081	349	35	236	20.1	67.6	0.88	-0.921217	69	8.78676
NM_005539	chr10	+	134201342	134446974	134389807	134390016	209	17	133	16.3	63.6	0.83	-0.440623	66	8.78676
NM_005539	chr10	+	134201342	134446974	134412556	134413196	640	42	415	13.1	64.8	0.62	-0.271349	64	8.78676
NM_005539	chr10	+	134201342	134446974	134416431	134416906	475	35	297	14.7	62.5	0.75	-0.549318	61.5	8.78676
NM_005539	chr10	+	134201342	134446974	134445283	134445684	401	30	236	15	58.9	0.87	-1.38161	62	8.78676
NM_030783	chr11	+	440279	481387	450468	450715	247	20	161	16.2	65.2	0.77	-0.478226	84	6.79059
NM_030783	chr11	+	440279	481387	479247	480115	868	59	568	13.6	65.4	0.64	-0.214246	83	6.79059
NM_021008	chr11	-	634224	685740	633879	634377	498	37	329	14.9	66.1	0.68	-0.227378	78	6.93419
NM_024698	chr11	-	780474	786221	781953	782400	447	38	304	17	68	0.74	-0.325837	80	6.66463
NM_020376	chr11	+	808901	815217	813556	814878	1322	108	894	16.3	67.6	0.72	-0.22728	79	8.7723
NM_001025234	chr11	+	834080	857116	839087	840982	1895	155	1095	16.4	57.8	0.98	-0.101598	80	8.25461
NM_001025235	chr11	+	832940	857116	839087	840982	1895	155	1095	16.4	57.8	0.98	-0.101598	80	8.12035
NM_001025236	chr11	+	832940	857116	839087	840982	1895	155	1095	16.4	57.8	0.98	-0.101598	80	8.2294
NM_001025237	chr11	+	834445	857116	839087	840982	1895	155	1095	16.4	57.8	0.98	-0.101598	80	8.26465
NM_001025238	chr11	+	832823	857116	839087	840982	1895	155	1095	16.4	57.8	0.98	-0.101598	80	8.2553
NM_012305	chr11	+	915840	1002240	933737	934142	405	30	247	14.8	61	0.96	-0.586315	80	7.59756
NM_012305	chr11	+	915840	1002240	983208	984006	798	58	515	14.5	64.5	0.7	-0.48887	87	7.59756
NM_012305	chr11	+	915840	1002240	997921	998343	422	31	283	14.7	67.1	0.66	-0.810834	84	7.59756
NM_019009	chr11	-	1252176	1287415	1254585	1255052	467	35	310	15	66.4	0.68	-0.641892	72	7.64287
NM_019009	chr11	-	1252176	1287415	1272043	1273691	1648	113	974	13.7	59.1	0.79	-1.04663	72	7.64287
NM_005456	chr11	+	45863777	45884592	45880556	45881303	747	52	498	13.9	66.7	0.64	-0.365244	81	6.97515
NM_052854	chr11	+	46255803	46299548	46273451	46274061	610	56	425	18.4	69.7	0.76	-0.197098	85	10.1227
NM_003646	chr11	+	46325531	46358680	46344481	46345111	630	48	451	15.2	71.6	0.61	-1.26269	82	7.05903
NM_024741	chr11	+	46678943	46684037	46683321	46683613	292	25	199	17.1	68.2	0.75	-0.151954	82	6.44896
NM_014067	chr11	-	63522606	63690161	63640431	63641758	1327	86	847	13	63.8	0.65	-0.964484	85	6.5092
NM_000932	chr11	+	63775697	63791604	63782489	63783312	823	55	546	13.4	66.3	0.61	-0.189469	81	8.56938
NM_001006944	chr11	+	63883200	63896263	63893390	63894763	1373	116	943	16.9	68.7	0.73	-0.998005	81	6.50874
NM_004630	chr11	-	64288653	64302817	64289512	64290339	827	56	527	13.5	63.7	0.69	-0.350513	84	8.48574
NM_201995	chr11	-	64288653	64302817	64289512	64290339	827	56	527	13.5	63.7	0.69	-0.350513	84	9.36299
NM_201998	chr11	-	64288653	64302817	64289512	64290339	827	56	527	13.5	63.7	0.69	-0.350513	84	9.34244
NM_006795	chr11	-	64376783	64402767	64377783	64378822	1039	77	670	14.8	64.5	0.71	-0.537982	85	9.04834
NM_005186	chr11	+	64705918	64736052	64728761	64728980	219	26	147	23.7	67.1	1.06	-0.43842	79	9.00267
NM_020680	chr11	+	65049123	65062758	65062511	65065078	2567	262	1779	20.4	69.3	0.85	-0.0335837	80	8.54273
NM_021070	chr11	-	65062606	65082275	65062511	65065078	2567	262	1779	20.4	69.3	0.85	-0.327888	80	8.1436
NM_006747	chr11	+	65162153	65174967	65164920	65165207	287	25	213	17.4	74.2	0.64	-0.129578	79	6.06568
NM_002896	chr11	+	66162713	66170516	66167501	66168163	662	47	360	14.2	54.4	0.96	-0.994451	85	9.33295
NM_000920	chr11	-	66372572	66482423	66384106	66384308	202	15	144	14.9	71.3	0.65	-0.123858	82	6.46717
NM_004910	chr11	-	67015815	67029419	67016989	67019291	2302	162	1535	14.1	66.7	0.64	-0.628018	85.6667	6.64648
NM_002335	chr11	+	67836683	67973319	67871893	67872302	409	34	265	16.6	64.8	0.79	-0.774528	83	7.36775
NM_002335	chr11	+	67836683	67973319	67935494	67935738	244	20	164	16.4	67.2	0.73	-0.270603	80	7.36775
NM_002335	chr11	+	67836683	67973319	67949086	67949374	288	24	192	16.7	66.7	0.77	-0.330309	79	7.36775
NM_001031847	chr11	-	68278663	68365975	68306807	68307169	362	29	235	16	64.9	0.76	-0.0915557	83	6.48899
NM_145015	chr11	-	68528437	68537426	68529372	68529685	313	24	208	15.3	66.5	0.7	-0.327317	85	8.33989
NM_139075	chr11	+	68572925	68614648	68606473	68607127	654	56	341	17.1	52.1	1.26	-1.28428	81	7.3584
NM_001235	chr11	+	74950817	74961494	74955014	74955680	666	65	446	19.5	67	0.87	-0.121597	83	10.7387
NM_002855	chr11	-	119036912	119104645	119040769	119041202	433	38	274	17.6	63.3	0.88	-0.337165	78	6.09198
NM_030775	chr12	+	1596482	1626638	1619016	1619324	308	36	224	23.4	72.7	0.89	-0.581182	82	9.39774
NM_032642	chr12	+	1608672	1626639	1619016	1619324	308	36	224	23.4	72.7	0.89	-0.581182	82	9.41088
NM_030775	chr12	+	1596482	1626638	1625258	1625504	246	23	173	18.7	70.3	0.76	-0.127019	83	9.39774
NM_032642	chr12	+	1608672	1626639	1625258	1625504	246	23	173	18.7	70.3	0.76	-0.127019	83	9.41088
NM_000719	chr12	+	2032676	2677376	2209423	2209876	453	42	323	18.5	71.3	0.75	-0.197598	80	6.77622
NM_014620	chr12	+	52696908	52736081	52709694	52709979	285	31	172	21.8	60.4	1.2	-0.167554	82	7.13092
NM_014620	chr12	+	52696908	52736081	52710877	52711440	563	48	378	17.1	67.1	0.76	-0.387808	81	7.13092
NM_002332	chr12	+	55808548	55893392	55865587	55865892	305	26	198	17	64.9	0.81	-0.212357	80	10.2311
NM_005230	chr12	+	95112337	95185737	95164928	95165298	370	30	233	16.2	63	0.82	-1.34775	86	7.48319
NM_014840	chr12	-	104981254	105057941	104984803	104985022	219	16	137	14.6	62.6	0.76	-0.487208	81	8.47808
NM_144671	chr12	-	110282865	110291308	110285217	110285627	410	40	276	19.5	67.3	0.87	-0.31179	77	6.23625
NM_005475	chr12	+	110328134	110373809	110340279	110341133	854	90	601	21.1	70.4	0.86	-0.168183	82	8.64412
NM_006861	chr12	-	119017281	119039026	119018935	119019400	465	33	295	14.2	63.4	0.73	-0.447423	85	7.25478
NM_006861	chr12	-	119017281	119039026	119021023	119021334	311	22	183	14.1	58.8	0.85	-1.22018	85	7.25478
NM_002859	chr12	-	119132632	119187946	119136094	119136326	232	17	150	14.7	64.7	0.71	-0.810325	81	7.90476
NM_001005366	chr12	-	120351281	120502747	120364436	120365101	665	57	450	17.1	67.7	0.75	-0.865279	86	7.91891
NM_001005366	chr12	-	120351281	120502747	120374606	120374893	287	24	202	16.7	70.4	0.68	-0.0807894	84	7.91891
NM_001005366	chr12	-	120351281	120502747	120375141	120375527	386	43	275	22.3	71.2	0.88	-0.205496	84	7.91891
NM_024667	chr12	-	121915831	121946665	121917594	121917871	277	25	193	18.1	69.7	0.83	-0.312954	79	7.27311
NM_025140	chr12	-	122986907	123023116	122987534	122988116	582	45	383	15.5	65.8	0.73	-1.50544	84	10.61
NM_006312	chr12	-	123374913	123586102	123375269	123376097	828	56	557	13.5	67.3	0.6	-0.370177	73	8.75884
NM_006312	chr12	-	123374913	123586102	123386972	123387546	574	52	363	18.1	63.2	0.95	-0.717639	72	8.75884
NM_016155	chr12	+	130878893	130902269	130890906	130891359	453	42	307	18.5	67.8	0.81	-0.304254	81	6.53291
NM_016155	chr12	+	130878893	130902269	130895130	130896042	912	62	599	13.6	65.7	0.63	-0.148954	80	6.53291
NM_003565	chr12	+	130945231	130973659	130958588	130960499	1911	163	1290	17.1	67.5	0.75	-0.223928	78	7.73718
NM_015409	chr12	+	131000460	131130958	131086278	131086900	622	41	355	13.2	57.1	0.81	-2.49692	83	7.71541
NM_138575	chr12	+	131797465	131805823	131804161	131804951	790	65	514	16.5	65.1	0.78	-0.848889	74	6.05324
NM_005895	chr12	-	131855567	131915361	131859736	131860071	335	26	226	15.5	67.5	0.68	-0.500785	62	8.9494
NM_014572	chr13	-	20445175	20533722	20460117	20461416	1299	121	885	18.6	68.1	0.81	-0.102822	83	9.39797
NM_000321	chr13	+	47775883	47954027	47788958	47789550	592	42	388	14.2	65.5	0.66	-0.933568	70	8.08086
NM_001001715	chr13	+	97593434	97695559	97626564	97627566	1002	77	636	15.4	63.5	0.76	-0.993162	83	6.39477
NM_005766	chr13	+	97593434	97900024	97626564	97627566	1002	77	636	15.4	63.5	0.76	-0.993162	83	9.96066
NM_003749	chr13	-	109204184	109236915	109232467	109238181	5714	548	3491	19.2	61.1	1.03	-0.153126	72	6.95882
NM_001845	chr13	-	109599310	109757497	109716325	109716726	401	28	246	14	61.3	0.74	-0.796758	84	10.5177
NM_001846	chr13	+	109757631	109963374	109888638	109888861	223	16	148	14.3	66.4	0.66	-0.0136072	80	10.071
NM_001846	chr13	+	109757631	109963374	109962285	109962548	263	23	169	17.5	64.3	0.86	-0.838035	84	10.071
NM_007111	chr13	+	113287056	113343787	113335534	113335817	283	20	152	14.1	53.7	1.03	-1.52115	84	9.2761
NM_007368	chr13	-	113765295	113916197	113798794	113799150	356	29	237	16.3	66.6	0.74	-0.59706	82	7.28298
NM_007368	chr13	-	113765295	113916197	113801604	113801835	231	21	159	18.2	68.8	0.77	-0.0302059	81	7.28298
NM_007368	chr13	-	113765295	113916197	113859020	113859682	662	100	474	30.2	71.6	1.18	-0.441273	79	7.28298
NM_004995	chr14	+	22375632	22386643	22384867	22385105	238	20	165	16.8	69.3	0.72	-0.419489	82	9.78806
NM_144985	chr14	-	22586109	22596587	22587063	22587581	518	55	326	21.2	62.9	1.07	-0.207809	80.5	6.01791
NM_016651	chr14	+	58174509	58184791	58182824	58183393	569	50	374	17.6	65.7	0.82	-0.850568	73	7.1134
NM_015549	chr14	+	64240945	64280813	64279596	64279842	246	19	159	15.4	64.6	0.74	-0.105964	85	6.07389
NM_001102	chr14	-	68410592	68515836	68411180	68411573	393	40	268	20.4	68.2	0.91	-0.471116	83	10.7898
NM_001039355	chr14	-	99827205	99842613	99828361	99829192	831	94	595	22.6	71.6	0.88	-0.406999	84	6.78168
NM_001014431	chr14	-	104306731	104333125	104322446	104322662	216	19	157	17.6	72.7	0.7	-0.511329	81	9.16843
NM_015005	chr14	+	104402698	104434132	104421222	104421970	748	64	530	17.1	70.9	0.68	-0.0305498	80	7.36109
NM_015005	chr14	+	104402698	104434132	104426899	104427129	230	18	135	15.7	58.7	0.92	-0.162937	80	7.36109
NM_001519	chr14	-	104746669	104838374	104756497	104756778	281	24	181	17.1	64.4	0.83	-0.371195	82	6.81577
NM_004689	chr14	+	104957230	105008102	105001287	105002557	1270	89	834	14	65.7	0.65	-0.964645	81	8.56262
NM_004689	chr14	+	104957230	105008102	105007309	105007603	294	29	205	19.7	69.7	0.83	-0.799576	81	8.56262
NM_005585	chr15	+	64781727	64861389	64860360	64860997	637	74	452	23.2	71	0.93	-0.447583	82	6.16028
NM_198525	chr15	-	87972204	87999686	87972669	87972908	239	18	163	15.1	68.2	0.66	-0.719887	83	8.30345
NM_198525	chr15	-	87972204	87999686	87992482	87993621	1139	107	719	18.8	63.1	0.94	-0.649041	84	8.30345
NM_181050	chr16	-	277440	342465	281082	281422	340	34	236	20	69.4	0.83	-0.00411116	79	6.83894
NM_181050	chr16	-	277440	342465	287028	287417	389	28	264	14.4	67.9	0.66	-1.63673	80	6.83894
NM_181050	chr16	-	277440	342465	287839	288235	396	33	280	16.7	70.7	0.67	-0.203464	80	6.83894
NM_181050	chr16	-	277440	342465	294244	294447	203	29	142	28.6	70	1.21	-0.609118	79	6.83894
NM_181050	chr16	-	277440	342465	314733	315329	596	45	396	15.1	66.4	0.7	-0.342134	77	6.83894
NM_021259	chr16	-	360776	371951	363872	364424	552	39	367	14.1	66.5	0.64	-0.512829	79	8.01153
NM_020664	chr16	+	391858	402488	400246	400779	533	40	363	15	68.1	0.65	-0.0469472	81	6.43623
NM_005632	chr16	+	517856	544637	527568	528173	605	53	399	17.5	66	0.81	-0.961905	79	6.64183
NM_021168	chr16	+	580179	619273	617368	618129	761	53	495	13.9	65	0.66	-0.270769	81	7.38403
NM_138769	chr16	+	658133	664172	660683	661167	484	38	325	15.7	67.1	0.7	-0.446502	80	7.72099
NM_003345	chr16	+	1299638	1315391	1303814	1304497	683	46	431	13.5	63.1	0.68	-0.388755	81	9.79199
NM_194259	chr16	+	1299638	1315391	1303814	1304497	683	46	431	13.5	63.1	0.68	-0.388755	81	6.39743
NM_194260	chr16	+	1299361	1315391	1303814	1304497	683	46	431	13.5	63.1	0.68	-0.388755	81	9.79421
NM_194261	chr16	+	1299180	1315391	1303814	1304497	683	46	431	13.5	63.1	0.68	-0.388755	81	9.69542
NM_032520	chr16	+	1341932	1353353	1351893	1352369	476	39	323	16.4	67.9	0.71	-0.268381	81	8.29748
NM_001287	chr16	-	1434935	1465086	1454413	1454860	447	35	293	15.7	65.5	0.74	-0.0797234	83	6.97586
NM_020825	chr16	+	1604641	1667908	1645867	1646245	378	28	259	14.8	68.5	0.63	-1.0148	84	7.28215
NM_015133	chr16	+	1696221	1760319	1736811	1737230	419	32	284	15.3	67.8	0.67	-1.07659	80	6.69912
NM_005326	chr16	-	1799104	1817196	1809078	1809298	220	19	143	17.3	65	0.83	-0.120163	85	7.0464
NM_178167	chr16	-	1987768	1999764	1992210	1992719	509	47	334	18.5	65.6	0.87	-0.0141585	79	6.42608
NM_000548	chr16	+	2037990	2078714	2065660	2065996	336	23	228	13.7	67.9	0.62	-1.1836	80	9.09624
NM_000548	chr16	+	2037990	2078714	2069160	2069670	510	36	336	14.1	65.9	0.65	-0.0162023	80	9.09624
NM_000296	chr16	-	2078711	2125900	2079804	2082171	2367	173	1529	14.6	64.6	0.7	-0.561946	80.5	8.29408
NM_000296	chr16	-	2078711	2125900	2097863	2102140	4277	325	2891	15.2	67.6	0.66	-0.0917421	82	8.29408
NM_032271	chr16	+	2145799	2168131	2166080	2166352	272	20	184	14.7	67.6	0.64	-0.263876	79	9.17562
NM_001694	chr16	+	2503953	2510220	2509560	2511072	1512	126	885	16.7	58.5	0.98	-0.196649	84	9.7349
NM_015944	chr16	+	2510363	2519732	2517803	2518368	565	42	391	14.9	69.2	0.62	-0.0444059	84	6.116
NM_002613	chr16	+	2527970	2593190	2567135	2567400	265	24	181	18.1	68.3	0.78	-0.261142	84	7.77284
NM_002613	chr16	+	2527970	2593190	2573480	2573921	441	35	287	15.9	65.1	0.75	-1.31832	84	7.77284
NM_018992	chr16	+	2672495	2699030	2697536	2697912	376	30	242	16	64.4	0.77	-0.422905	86	8.28516
NM_016333	chr16	+	2742330	2761414	2752267	2752575	308	24	194	15.6	63	0.79	-0.0792184	85	8.32781
NM_016333	chr16	+	2742330	2761414	2755576	2756796	1220	105	720	17.2	59	1.03	-0.88289	85	8.32781
NM_004220	chr16	+	3125057	3132805	3132182	3132670	488	34	310	13.9	63.5	0.84	-1.39569	84	8.14529
NM_001116	chr16	-	3952652	4106187	3956195	3957044	849	65	511	15.3	60.2	0.85	-0.814353	82.5	8.32645
NM_001116	chr16	-	3952652	4106187	3967423	3967710	287	23	192	16	66.9	0.72	-0.907579	85	8.32645
NM_001116	chr16	-	3952652	4106187	3969158	3969414	256	21	177	16.4	69.1	0.69	-0.115807	84	8.32645
NM_002705	chr16	-	4872508	4927137	4873624	4874564	940	70	599	14.9	63.7	0.75	-0.697729	85	6.23091
NM_018119	chr16	+	22216241	22252844	22244649	22245077	428	31	264	14.5	61.7	0.76	-0.646502	80	7.99124
NM_005115	chr16	+	29739287	29766842	29760574	29760896	322	25	212	15.5	65.8	0.72	-0.0592197	81	8.4735
NM_005115	chr16	+	29739287	29766842	29763404	29763696	292	20	188	13.7	64.4	0.66	-0.0215619	81	8.4735
NM_004783	chr16	+	29892722	29911082	29906287	29906507	220	17	156	15.5	70.9	0.62	-0.144404	84	6.25983
NM_016151	chr16	+	29892722	29907220	29906287	29906507	220	17	156	15.5	70.9	0.62	-0.144404	84	8.47964
NM_033410	chr16	-	30472585	30477085	30473943	30474779	836	78	581	18.7	69.5	0.78	-0.669824	84	6.89001
NM_014712	chr16	+	30876115	30903482	30899329	30899630	301	27	209	17.9	69.4	0.75	-0.327234	81	7.68703
NM_024706	chr16	-	30979671	30993005	30980489	30981107	618	65	417	21	67.5	0.93	-0.210454	84	6.5689
NM_024706	chr16	-	30979671	30993005	30982585	30983257	672	62	454	18.5	67.6	0.81	-0.957316	84	6.5689
NM_014699	chr16	+	30993243	31002327	30998890	30999297	407	38	281	18.7	69	0.78	-0.318085	85	6.81705
NM_015927	chr16	+	31392026	31396782	31394653	31396468	1815	151	1212	16.6	66.8	0.76	-0.21475	75	8.84818
NM_014062	chr16	-	68333274	68346330	68333589	68333895	306	24	186	15.7	60.8	0.85	-1.15656	82	8.80189
NM_138383	chr16	-	69252607	69277455	69270962	69271880	918	73	572	15.9	62.3	0.82	-0.141954	80	9.20176
NM_014615	chr16	+	84204424	84267311	84233792	84234093	301	21	204	14	67.8	0.61	-0.14169	81	8.47564
NM_001451	chr16	+	85101633	85105571	85103860	85104133	273	21	180	15.4	65.9	0.71	-0.946688	83	7.91306
NM_017566	chr16	-	86298918	86357043	86300057	86300610	553	41	374	14.8	67.6	0.65	-0.084321	83	7.0289
NM_017869	chr16	+	86542538	86668425	86576132	86576455	323	24	214	14.9	66.3	0.72	-0.16245	82	6.22142
NM_079837	chr16	+	86542538	86668425	86576132	86576455	323	24	214	14.9	66.3	0.72	-0.16245	82	6.30335
NM_017869	chr16	+	86542538	86668425	86610274	86610841	567	55	379	19.4	66.8	0.9	-0.229476	82.5	6.22142
NM_079837	chr16	+	86542538	86668425	86610274	86610841	567	55	379	19.4	66.8	0.9	-0.229476	82.5	6.30335
NM_017869	chr16	+	86542538	86668425	86658974	86659412	438	30	282	13.7	64.4	0.66	-0.388749	84	6.22142
NM_079837	chr16	+	86542538	86668425	86658974	86659412	438	30	282	13.7	64.4	0.66	-0.388749	84	6.30335
NM_017869	chr16	+	86542538	86668425	86667424	86668036	612	55	410	18	67	0.8	-1.73098	83	6.22142
NM_079837	chr16	+	86542538	86668425	86667424	86668036	612	55	410	18	67	0.8	-1.73098	83	6.30335
NM_002461	chr16	-	87245848	87256996	87249018	87249567	549	46	374	16.8	68.1	0.73	-0.316005	78	6.90657
NM_178841	chr16	-	87290409	87300301	87292542	87292900	358	27	250	15.1	69.8	0.62	-0.0150299	78	7.03701
NM_013275	chr16	-	87861535	88084470	87872964	87876022	3058	235	2021	15.4	66.1	0.71	-0.474666	82	6.83538
NM_003119	chr16	+	88102305	88151675	88135799	88136039	240	19	172	15.8	71.7	0.62	-0.0275294	81	7.65263
NM_002386	chr16	+	88511787	88514886	88513414	88513857	443	38	294	17.2	66.4	0.78	-0.0996386	73.5	6.35323
NM_006086	chr16	+	88517245	88530006	88528772	88529757	985	80	636	16.2	64.6	0.78	-0.052722	76	8.63872
NM_182705	chr17	-	289998	295959	291244	291492	248	22	165	17.7	66.5	0.8	-0.235828	85	7.2578
NM_182705	chr17	-	289998	295959	293043	293560	517	39	335	15.1	64.8	0.73	-0.695546	85	7.2578
NM_022463	chr17	-	649334	829760	691367	691657	290	30	205	20.7	70.7	0.87	-1.95107	82	8.84837
NM_022463	chr17	-	649334	829760	796957	797250	293	20	174	13.7	59.4	0.78	-0.583622	80	8.84837
NM_001092	chr17	-	853508	959074	856731	857192	461	50	339	21.7	73.5	0.81	-0.108119	79	7.5193
NM_001092	chr17	-	853508	959074	862486	862729	243	21	165	17.3	67.9	0.75	-0.482851	79	7.5193
NM_001092	chr17	-	853508	959074	922342	922652	310	26	212	16.8	68.4	0.76	-1.88463	79.5	7.5193
NM_033375	chr17	-	1314229	1341722	1321966	1322210	244	22	164	18	67.2	0.81	-0.0530936	82	10.1998
NM_152348	chr17	+	1566566	1588643	1574495	1576647	2152	154	1388	14.3	64.5	0.69	-0.270435	81	6.01144
NM_152348	chr17	+	1566566	1588643	1583803	1584242	439	42	299	19.1	68.1	0.83	-1.13052	80	6.01144
NM_020310	chr17	-	2234103	2251008	2242672	2244266	1594	184	1124	23.1	70.5	0.94	-0.0657046	80	6.52135
NM_015229	chr17	-	2539429	2561677	2541674	2543024	1350	105	892	15.6	66.1	0.71	-0.106581	78.75	7.99676
NM_015229	chr17	-	2539429	2561677	2545001	2545550	549	37	360	13.5	65.6	0.63	-0.389389	80	7.99676
NM_015229	chr17	-	2539429	2561677	2547725	2548730	1005	89	675	17.7	67.2	0.79	-0.0202978	81	7.99676
NM_015113	chr17	-	3854487	3993002	3854742	3855126	384	36	261	18.8	68	0.83	-0.834031	82	7.24914
NM_001005408	chr17	-	7159674	7173362	7168140	7168422	282	22	190	15.6	67.4	0.69	-0.601593	83	6.53621
NM_020795	chr17	+	7252225	7263903	7261095	7261669	574	55	420	19.2	73.2	0.73	-0.158459	79	8.91741
NM_020899	chr17	-	7303408	7328292	7306647	7306954	307	25	218	16.3	71	0.65	-0.127763	82	9.07113
NM_005964	chr17	-	8318254	8474761	8320897	8321264	367	28	226	15.3	61.6	0.81	-0.373268	86	9.39264
NM_006042	chr17	-	13339730	13445969	13340483	13340813	330	36	219	21.8	66.4	1	-0.982522	77	6.04404
NM_020652	chr17	+	15543615	15564823	15548277	15549124	847	61	524	14.4	61.9	0.75	-0.810769	76.5	6.04754
NM_015134	chr17	+	16886831	17029597	17008301	17008665	364	28	248	15.4	68.1	0.68	-0.0744549	85	9.97045
NM_201274	chr17	+	16886831	17029598	17008301	17008665	364	28	248	15.4	68.1	0.68	-0.0744549	85	10.6039
NM_002018	chr17	-	18088877	18102780	18091004	18091897	893	63	541	14.1	60.6	0.77	-0.53111	84	9.44747
NM_001030006	chr17	+	30938394	31077549	30947701	30948257	556	53	394	19.1	70.9	0.76	-1.67736	80	9.03715
NM_007026	chr17	+	32924063	32947701	32946835	32947139	304	21	176	13.8	57.9	0.82	-1.0927	81	8.79118
NM_012232	chr17	-	37807994	37828864	37810158	37811063	905	97	591	21.4	65.3	1.01	-0.836085	79	10.8662
NM_003204	chr17	+	43480684	43493906	43491648	43491968	320	28	206	17.5	64.4	0.85	-0.660019	82	9.82605
NM_002611	chr17	+	45527694	45543422	45538256	45538477	221	18	144	16.3	65.2	0.77	-0.0438796	82	7.2617
NM_025149	chr17	+	45858517	45907199	45900569	45901899	1330	116	892	17.4	67.1	0.78	-0.325663	84	7.44821
NM_017949	chr17	-	53295335	53335749	53317572	53318228	656	53	405	16.2	61.7	0.85	-0.0363214	78	7.08722
NM_006039	chr17	+	58058493	58124684	58098239	58098611	372	25	248	13.4	66.7	0.62	-0.796508	81	9.13393
NM_017728	chr17	+	70284216	70347517	70343650	70344245	595	43	378	14.5	63.5	0.74	-2.65607	82	6.09752
NM_014603	chr17	+	70495321	70513487	70510799	70511573	774	73	546	18.9	70.5	0.76	-0.102181	85	7.65186
NM_207346	chr17	+	71024203	71032415	71029608	71029978	370	32	253	17.3	68.4	0.74	-0.246032	85	6.72473
NM_006640	chr17	+	72827191	73008273	72909879	72910122	243	24	169	19.8	69.5	0.82	-0.0878621	81	9.07391
NM_138793	chr17	-	74499392	74517494	74501237	74501634	397	39	253	19.6	63.7	0.97	-1.29184	80	8.68286
NM_138793	chr17	-	74499392	74517494	74504968	74505214	246	18	162	14.6	65.9	0.71	-0.0616504	80	8.68286
NM_003655	chr17	-	75421549	75427808	75420461	75423641	3180	225	1972	14.2	62	0.74	-0.230291	78	7.36475
NM_019020	chr17	-	75528413	75624242	75529234	75529477	243	20	167	16.5	68.7	0.7	-0.150434	77	6.42597
NM_019020	chr17	-	75528413	75624242	75532182	75532480	298	24	176	16.1	59.1	0.93	-0.721405	77	6.42597
NM_019020	chr17	-	75528413	75624242	75537316	75537568	252	19	169	15.1	67.1	0.67	-0.0187562	78	6.42597
NM_019020	chr17	-	75528413	75624242	75570086	75570303	217	18	144	16.6	66.4	0.78	-0.0766831	81	6.42597
NM_019020	chr17	-	75528413	75624242	75598575	75599077	502	40	347	15.9	69.1	0.67	-0.466766	79	6.42597
NM_000199	chr17	-	75797673	75808794	75798898	75799541	643	46	418	14.3	65	0.7	-0.873816	80	6.88934
NM_000199	chr17	-	75797673	75808794	75802912	75803166	254	21	163	16.5	64.2	0.8	-0.238104	81	6.88934
NM_020914	chr17	+	75849261	75984680	75936056	75936582	526	38	305	14.4	58	0.86	-0.938963	82.75	6.25381
NM_020761	chr17	+	76133219	76554768	76410673	76410987	314	24	201	15.3	64	0.79	-1.40936	83	6.3002
NM_020761	chr17	+	76133219	76554768	76463996	76465528	1532	123	1039	16.1	67.8	0.7	-0.257522	82	6.3002
NM_020761	chr17	+	76133219	76554768	76536492	76536828	336	26	226	15.5	67.3	0.69	-0.307616	79	6.3002
NM_020761	chr17	+	76133219	76554768	76552432	76552991	559	43	381	15.4	68.2	0.66	-0.186526	81	6.3002
NM_000918	chr17	-	77394322	77411833	77397548	77397777	229	17	145	14.8	63.3	0.74	-0.518125	83	10.4194
NM_005782	chr17	-	77439008	77442758	77439500	77439782	282	22	175	15.6	62.1	0.83	-0.0774075	82	8.50233
NM_024083	chr17	+	77528714	77568571	77537902	77538626	724	53	478	14.6	66	0.71	-0.163086	81	6.80326
NM_024083	chr17	+	77528714	77568571	77545430	77545783	353	26	244	14.7	69.1	0.62	-0.0454082	79.5	6.80326
NM_024083	chr17	+	77528714	77568571	77560143	77560427	284	25	202	17.6	71.1	0.7	-0.109946	78	6.80326
NM_004104	chr17	-	77629502	77649395	77630012	77630763	751	56	490	14.9	65.2	0.7	-0.140036	81	8.25682
NM_004104	chr17	-	77629502	77649395	77632160	77632539	379	33	257	17.4	67.8	0.76	-0.0219464	82	8.25682
NM_004104	chr17	-	77629502	77649395	77634340	77634755	415	29	268	14	64.6	0.69	-0.34595	82	8.25682
NM_004104	chr17	-	77629502	77649395	77634942	77635316	374	38	269	20.3	71.9	0.79	-0.270685	81	8.25682
NM_198082	chr17	-	77652634	77763978	77678329	77678622	293	22	187	15	63.8	0.74	-0.0035847	78	6.77391
NM_001893	chr17	-	77795528	77824862	77796088	77796578	490	39	315	15.9	64.3	0.78	-0.765473	80	9.80768
NM_139062	chr17	-	77795528	77824862	77796088	77796578	490	39	315	15.9	64.3	0.78	-0.765473	80	9.79131
NM_001893	chr17	-	77795528	77824862	77799978	77800216	238	22	161	18.5	67.6	0.82	-0.365787	80	9.80768
NM_139062	chr17	-	77795528	77824862	77799978	77800216	238	22	161	18.5	67.6	0.82	-0.365787	80	9.79131
NM_001893	chr17	-	77795528	77824862	77804935	77806431	1496	139	1043	18.6	69.7	0.77	-0.495689	80	9.80768
NM_139062	chr17	-	77795528	77824862	77804935	77806431	1496	139	1043	18.6	69.7	0.77	-0.495689	80	9.79131
NM_004514	chr17	+	78070882	78155772	78148096	78148308	212	17	144	16	67.9	0.7	-0.00489074	81	8.06167
NM_001004431	chr17	+	78630855	78646011	78635915	78636533	618	47	407	15.2	65.9	0.72	-0.208286	79	7.19884
NM_001004431	chr17	+	78630855	78646011	78638783	78639230	447	34	294	15.2	65.8	0.7	-0.278366	78	7.19884
NM_001004431	chr17	+	78630855	78646011	78640804	78641254	450	34	293	15.1	65.1	0.71	-0.745893	78	7.19884
NM_001004431	chr17	+	78630855	78646011	78645413	78646420	1007	69	593	13.7	58.9	0.79	-0.70789	79	7.19884
NM_015210	chr18	+	8707368	8822775	8774147	8774583	436	35	289	16.1	66.3	0.74	-0.21144	86	8.89749
NM_006788	chr18	+	9465529	9528106	9468452	9468920	468	39	298	16.7	63.7	0.82	-0.563062	84	9.49812
NM_032525	chr18	+	12298256	12316568	12315040	12316049	1009	79	639	15.7	63.3	0.78	-0.564743	82	10.92
NM_015277	chr18	+	53862616	54219752	54073967	54075048	1081	96	713	17.8	66	0.81	-1.516	85	7.37507
NM_017550	chr19	-	256574	295791	257214	257681	467	40	339	17.1	72.6	0.66	-0.425937	65	6.05709
NM_004359	chr19	+	482732	493087	486919	487783	864	64	592	14.8	68.5	0.63	-0.140216	80	8.73512
NM_004359	chr19	+	482732	493087	491021	493033	2012	142	1380	14.1	68.6	0.6	-0.317927	81	8.73512
NM_001728	chr19	+	523536	534493	528755	529441	686	61	490	17.8	71.4	0.71	-0.0781461	76	9.71541
NM_198591	chr19	+	522324	534493	528755	529441	686	61	490	17.8	71.4	0.71	-0.0781461	76	9.69202
NM_001728	chr19	+	523536	534493	530191	530790	599	43	399	14.4	66.6	0.65	-0.13512	75	9.71541
NM_198591	chr19	+	522324	534493	530191	530790	599	43	399	14.4	66.6	0.65	-0.13512	75	9.69202
NM_005035	chr19	-	568222	584568	566691	574505	7814	510	4829	13.1	61.8	0.68	-0.696971	82.3333	6.60562
NM_194460	chr19	-	598525	614227	596890	599623	2733	184	1733	13.5	63.4	0.67	-1.55847	81	7.00126
NM_194460	chr19	-	598525	614227	602197	604193	1996	141	1349	14.1	67.6	0.62	-0.537744	81	7.00126
NM_002819	chr19	+	748391	763327	755218	757663	2445	202	1655	16.5	67.7	0.72	-0.843861	81.1429	8.94133
NM_031991	chr19	+	748391	763327	755218	757663	2445	202	1655	16.5	67.7	0.72	-0.843861	81.1429	8.99518
NM_002819	chr19	+	748391	763327	758131	758445	314	25	208	15.9	66.2	0.73	-0.612769	81	8.94133
NM_031991	chr19	+	748391	763327	758131	758445	314	25	208	15.9	66.2	0.73	-0.612769	81	8.99518
NM_002819	chr19	+	748391	763327	759004	759834	830	65	539	15.7	64.9	0.74	-0.917791	81	8.94133
NM_031991	chr19	+	748391	763327	759004	759834	830	65	539	15.7	64.9	0.74	-0.917791	81	8.99518
NM_002819	chr19	+	748391	763327	762904	764824	1920	213	1258	22.2	65.5	1.03	-2.52597	81	8.94133
NM_031991	chr19	+	748391	763327	762904	764824	1920	213	1258	22.2	65.5	1.03	-2.52597	81	8.99518
NM_005481	chr19	-	818961	844218	826214	826420	206	20	134	19.4	65	0.98	-0.30495	82	6.93484
NM_005224	chr19	+	877036	923803	891723	893490	1767	130	1101	14.7	62.3	0.76	-0.70865	81	7.40513
NM_001033026	chr19	-	960649	972141	958551	963222	4671	350	3130	15	67	0.67	-0.628775	80.875	9.04514
NM_033420	chr19	-	960649	972141	958551	963222	4671	350	3130	15	67	0.67	-0.628775	80.875	8.20405
NM_001033026	chr19	-	960649	972141	965273	965578	305	30	211	19.7	69.2	0.83	-0.176086	79	9.04514
NM_033420	chr19	-	960649	972141	965273	965578	305	30	211	19.7	69.2	0.83	-0.176086	79	8.20405
NM_002695	chr19	-	1037577	1046391	1044223	1044452	229	16	144	14	62.9	0.71	-0.0911272	76	8.11209
NM_014963	chr19	-	1058632	1125282	1059394	1060610	1216	117	827	19.2	68	0.83	-0.116613	74	6.71441
NM_014963	chr19	-	1058632	1125282	1069907	1071215	1308	93	886	14.2	67.7	0.63	-0.660857	74	6.71441
NM_014963	chr19	-	1058632	1125282	1073475	1074287	812	62	543	15.3	66.9	0.71	-0.192065	74	6.71441
NM_014963	chr19	-	1058632	1125282	1091837	1092119	282	24	180	17	63.8	0.85	-0.799172	77	6.71441
NM_014963	chr19	-	1058632	1125282	1105023	1105486	463	48	344	20.7	74.3	0.77	-0.228297	72	6.71441
NM_014963	chr19	-	1058632	1125282	1108315	1109900	1585	115	1056	14.5	66.6	0.66	-0.130813	74	6.71441
NM_000455	chr19	+	1156797	1179434	1178531	1181256	2725	316	1793	23.2	65.8	1.07	-0.134782	78	7.66676
NM_032853	chr19	+	1305975	1329430	1327554	1328568	1014	65	605	12.8	59.7	0.72	-1.66935	83	6.77917
NM_024407	chr19	+	1334882	1346588	1338527	1339009	482	32	316	13.3	65.6	0.64	-0.50949	84	7.25981
NM_024407	chr19	+	1334882	1346588	1341693	1342304	611	55	413	18	67.6	0.79	-0.39309	82	7.25981
NM_018959	chr19	+	1358583	1386682	1374752	1375006	254	21	166	16.5	65.4	0.78	-0.0882858	82	7.90846
NM_170711	chr19	+	1358583	1386682	1374752	1375006	254	21	166	16.5	65.4	0.78	-0.0882858	82	7.40585
NM_018959	chr19	+	1358583	1386682	1379803	1380303	500	38	339	15.2	67.8	0.66	-0.830539	82	7.90846
NM_170711	chr19	+	1358583	1386682	1379803	1380303	500	38	339	15.2	67.8	0.66	-0.830539	82	7.40585
NM_203304	chr19	-	1505667	1519057	1506539	1507866	1327	169	974	25.5	73.4	0.96	-0.389864	80	6.73224
NM_003926	chr19	-	1527677	1543652	1528467	1529509	1042	70	677	13.4	65	0.64	-0.476624	84	7.71462
NM_003926	chr19	-	1527677	1543652	1535445	1536247	802	89	549	22.2	68.5	0.95	-1.08276	85	7.71462
NM_003200	chr19	-	1560292	1603326	1576317	1576612	295	26	212	17.6	71.9	0.73	-0.462884	83	7.19384
NM_003200	chr19	-	1560292	1603326	1597117	1597713	596	40	397	13.4	66.6	0.61	-0.536948	83	7.19384
NM_020695	chr19	-	1766244	1799452	1766700	1767784	1084	79	741	14.6	68.4	0.64	-0.0603003	81	6.25582
NM_079834	chr19	+	1856372	1877012	1862923	1864406	1483	157	1083	21.2	73	0.8	-0.287157	76	7.88785
NM_001319	chr19	+	1892160	1932336	1912001	1912325	324	26	225	16	69.4	0.69	-0.361847	82	8.06879
NM_001319	chr19	+	1892160	1932336	1920438	1921136	698	53	468	15.2	67	0.68	-0.462978	82	8.06879
NM_001319	chr19	+	1892160	1932336	1929370	1930984	1614	123	975	15.2	60.4	0.84	-0.299915	81	8.06879
NM_017797	chr19	-	1936446	1966702	1936880	1937198	318	28	212	17.6	66.7	0.8	-0.410666	82	9.56269
NM_017572	chr19	-	1988469	2002243	1989292	1989691	399	31	274	15.5	68.7	0.68	-0.321921	77	7.17218
NM_199054	chr19	-	1988469	2002243	1989292	1989691	399	31	274	15.5	68.7	0.68	-0.321921	77	7.33576
NM_130807	chr19	-	2022034	2047269	2027483	2027982	499	43	327	17.2	65.5	0.8	-0.326773	81	8.5044
NM_130807	chr19	-	2022034	2047269	2029162	2029511	349	31	224	17.8	64.2	0.86	-0.713759	81	8.5044
NM_003938	chr19	-	2051993	2102556	2066261	2066783	522	40	324	15.3	62.1	0.8	-0.0557332	77	8.46921
NM_003938	chr19	-	2051993	2102556	2082292	2082881	589	61	413	20.7	70.1	0.84	-0.922407	79	8.46921
NM_016199	chr19	-	2272519	2279614	2272581	2272990	409	30	286	14.7	69.9	0.6	-0.0697162	77	7.87773
NM_152988	chr19	+	2279628	2306100	2285495	2285771	276	22	191	15.9	69.2	0.67	-0.549882	77	6.77689
NM_152988	chr19	+	2279628	2306100	2290007	2291236	1229	87	809	14.2	65.8	0.65	-0.149722	75.5	6.77689
NM_152988	chr19	+	2279628	2306100	2302518	2302767	249	20	157	16.1	63.1	0.83	-1.66113	75	6.77689
NM_032737	chr19	-	2379163	2407958	2383847	2386203	2356	153	1569	13	66.6	0.61	-0.285509	85	9.44314
NM_144564	chr19	-	2683522	2691074	2683656	2684539	883	75	614	17	69.5	0.7	-0.252021	82	6.74871
NM_003021	chr19	-	2705711	2734354	2705545	2705938	393	34	254	17.3	64.6	0.83	-0.435674	79	8.70108
NM_003021	chr19	-	2705711	2734354	2712665	2712909	244	33	160	27	65.6	1.3	-0.0530052	80	8.70108
NM_002067	chr19	+	3045407	3072454	3061096	3061438	342	31	234	18.1	68.4	0.78	-0.419321	82	8.37115
NM_002067	chr19	+	3045407	3072454	3063647	3064628	981	78	639	15.9	65.1	0.75	-0.213669	81	8.37115
NM_020170	chr19	+	3136874	3160573	3155526	3155916	390	34	273	17.4	70	0.71	-0.03084	82	7.43093
NM_005597	chr19	+	3317572	3414603	3332525	3333275	750	73	510	19.5	68	0.84	-0.0308312	79	8.69731
NM_205843	chr19	+	3310615	3414603	3332525	3333275	750	73	510	19.5	68	0.84	-0.0308312	79	9.4482
NM_031304	chr19	-	3441819	3451621	3442051	3443502	1451	109	933	15	64.3	0.73	-0.400833	81	7.52517
NM_012398	chr19	-	3581181	3651445	3588308	3588715	407	36	275	17.7	67.6	0.78	-0.257599	78	9.51504
NM_012398	chr19	-	3581181	3651445	3602790	3603134	344	35	236	20.3	68.6	0.87	-0.281975	78	9.51504
NM_012398	chr19	-	3581181	3651445	3604266	3604645	379	28	246	14.8	64.9	0.71	-0.498234	75	9.51504
NM_012398	chr19	-	3581181	3651445	3610641	3610949	308	23	200	14.9	64.9	0.71	-0.29438	73	9.51504
NM_001348	chr19	-	3909451	3920826	3909492	3910812	1320	122	923	18.5	69.9	0.76	-0.418692	83	7.93333
NM_001348	chr19	-	3909451	3920826	3911981	3912241	260	24	173	18.5	66.5	0.83	-0.821389	84	7.93333
NM_015897	chr19	+	3958748	3989067	3983949	3984644	695	55	480	15.8	69.1	0.66	-0.626221	73.5	6.14325
NM_015897	chr19	+	3958748	3989067	3988344	3989887	1543	113	930	14.6	60.3	0.81	-0.829823	74.75	6.14325
NM_015898	chr19	-	3996215	4017816	3998754	3999428	674	60	399	17.8	59.2	1.02	-0.716633	73	9.05552
NM_015898	chr19	-	3996215	4017816	4004879	4006289	1410	153	919	21.7	65.2	1.02	-0.721278	73	9.05552
NM_030662	chr19	-	4041319	4075126	4041200	4041688	488	38	324	15.6	66.4	0.71	-1.16965	85	8.70903
NM_030662	chr19	-	4041319	4075126	4052029	4052515	486	32	323	13.2	66.5	0.61	-0.0495029	84	8.70903
NM_030662	chr19	-	4041319	4075126	4053299	4054041	742	55	519	14.8	69.9	0.61	-0.181796	84	8.70903
NM_152362	chr19	+	4590526	4606580	4603103	4603500	397	46	291	23.2	73.3	0.87	-0.234123	80	6.00917
NM_139159	chr19	-	4626243	4674855	4633726	4634430	704	62	511	17.6	72.6	0.67	-0.128989	82	7.92322
NM_013282	chr19	+	4861565	4913165	4883661	4884085	424	36	283	17	66.7	0.76	-0.594509	80	7.46924
NM_013282	chr19	+	4861565	4913165	4892521	4892981	460	38	304	16.5	66.1	0.76	-0.909355	81	7.46924
NM_013282	chr19	+	4861565	4913165	4895132	4895498	366	27	244	14.8	66.7	0.67	-0.971146	81	7.46924
NM_013282	chr19	+	4861565	4913165	4901670	4901940	270	20	174	14.8	64.4	0.74	-0.331372	81	7.46924
NM_015015	chr19	+	4920123	5104608	4983461	4984099	638	48	394	15	61.8	0.8	-0.348321	80	7.41741
NM_015015	chr19	+	4920123	5104608	5047559	5047857	298	36	215	24.2	72.1	0.97	-0.695637	83	7.41741
NM_015015	chr19	+	4920123	5104608	5061587	5061853	266	24	180	18	67.7	0.79	-0.33603	83	7.41741
NM_015015	chr19	+	4920123	5104608	5084932	5085168	236	19	164	16.1	69.5	0.67	-0.249291	83	7.41741
NM_015015	chr19	+	4920123	5104608	5096816	5097296	480	39	318	16.2	66.2	0.79	-0.212513	81	7.41741
NM_014649	chr19	-	5538009	5573938	5538685	5538939	254	19	177	15	69.7	0.65	-0.259327	79	8.2908
NM_014649	chr19	-	5538009	5573938	5544709	5545194	485	54	334	22.3	68.9	0.96	-0.335627	81	8.2908
NM_000635	chr19	-	5944174	6061664	5953691	5953938	247	23	167	18.6	67.6	0.84	-0.0640893	80	6.4497
NM_005934	chr19	-	6161391	6230959	6162767	6164128	1361	94	909	13.8	66.8	0.62	-0.450368	83	8.10195
NM_015318	chr19	+	7365998	7443370	7410923	7411186	263	31	178	23.6	67.7	1.03	-0.589597	78	7.48353
NM_018083	chr19	+	7487003	7491911	7490325	7491281	956	94	642	19.7	67.2	0.89	-0.783583	78	6.12252
NM_006702	chr19	+	7505037	7532653	7520785	7521998	1213	86	784	14.2	64.6	0.68	-0.666116	73.8333	8.6103
NM_006702	chr19	+	7505037	7532653	7527639	7528262	623	57	419	18.3	67.3	0.82	-0.0679306	72	8.6103
NM_004218	chr19	+	8361204	8375317	8374304	8374944	640	56	450	17.5	70.3	0.72	-0.130126	77	9.24826
NM_001005415	chr19	+	8384186	8409899	8401554	8401794	240	18	157	15	65.4	0.7	-0.275898	79	6.38274
NM_005968	chr19	+	8415802	8459996	8456539	8457215	676	60	471	17.8	69.7	0.75	-0.188571	80	9.55589
NM_007065	chr19	-	10362808	10375271	10367260	10367993	733	54	498	14.7	67.9	0.67	-0.263766	81	9.82411
NM_012289	chr19	-	10457795	10474481	10463280	10463878	598	60	397	20.1	66.4	0.91	-0.307423	80	8.92972
NM_003072	chr19	+	10932597	11033958	11005458	11005853	395	38	265	19.2	67.1	0.86	-0.0979092	82	8.9422
NM_003072	chr19	+	10932597	11033958	11012870	11013157	287	29	190	20.2	66.2	0.92	-0.0462158	81	8.9422
NM_001299	chr19	+	11510578	11522138	11521299	11521521	222	17	151	15.3	68	0.66	-0.067894	81	9.2112
NM_002501	chr19	+	12967583	13070610	12973170	12973809	639	46	398	14.4	62.3	0.74	-0.594017	74	9.70443
NM_002501	chr19	+	12967583	13070610	12981986	12985368	3382	225	2114	13.3	62.5	0.68	-0.0813767	75	9.70443
NM_002501	chr19	+	12967583	13070610	13059699	13059999	300	26	190	17.3	63.3	0.88	-0.36779	82	9.70443
NM_023072	chr19	+	13767273	13804044	13780665	13781076	411	32	263	15.6	64	0.76	-0.0934486	78	7.77613
NM_000435	chr19	-	15131443	15172792	15145879	15146209	330	35	231	21.2	70	0.87	-0.281719	77	7.71244
NM_058243	chr19	-	15209300	15252262	15209678	15210007	329	27	221	16.4	67.2	0.75	-0.975221	76	7.61771
NM_005858	chr19	-	15325334	15351603	15344626	15345144	518	43	354	16.6	68.3	0.71	-0.153757	69	7.74542
NM_014371	chr19	-	15351858	15390833	15373025	15373393	368	29	243	15.8	66	0.72	-0.200456	70	8.59769
NM_006387	chr19	-	16489699	16514263	16490929	16491156	227	20	148	17.6	65.2	0.84	-0.391907	82	7.46044
NM_006387	chr19	-	16489699	16514263	16496980	16497637	657	57	469	17.4	71.4	0.7	-1.9924	82	7.46044
NM_006387	chr19	-	16489699	16514263	16504273	16504599	326	26	215	16	66	0.74	-0.165978	82	7.46044
NM_015260	chr19	+	16801217	16852164	16850009	16850700	691	54	477	15.6	69	0.66	-0.730089	68	6.4916
NM_004145	chr19	+	17047590	17185104	17073479	17074332	853	60	540	14.1	63.3	0.7	-0.619129	81	7.07579
NM_004145	chr19	+	17047590	17185104	17177757	17178205	448	34	306	15.2	68.3	0.65	-0.363073	81	7.07579
NM_004145	chr19	+	17047590	17185104	17183471	17183988	517	46	366	17.8	70.8	0.72	-0.352177	81	7.07579
NM_198580	chr19	+	17442299	17477977	17458344	17459000	656	59	466	18	71	0.72	-0.0604785	83	6.63593
NM_012088	chr19	+	17483431	17493097	17492780	17492992	212	18	147	17	69.3	0.72	-0.286866	80	6.81836
NM_018174	chr19	+	17691302	17706324	17697755	17699816	2061	165	1443	16	70	0.66	-0.161814	76.8	6.59851
NM_001025604	chr19	+	17972943	17985911	17979741	17980553	812	98	559	24.1	68.8	1.02	-0.0113039	82.5	6.15245
NM_005027	chr19	+	18125015	18142343	18140514	18141178	664	58	430	17.5	64.8	0.83	-0.474808	83	7.52291
NM_001009998	chr19	+	18391220	18406371	18404828	18410161	5333	395	3568	14.8	66.9	0.66	-0.412008	78	7.53212
NM_016368	chr19	-	18406197	18410111	18404828	18410161	5333	395	3568	14.8	66.9	0.66	-0.342179	78	7.01484
NM_032627	chr19	+	18391220	18406371	18404828	18410161	5333	395	3568	14.8	66.9	0.66	-0.412008	78	7.66787
NM_018316	chr19	+	18608837	18642302	18639485	18641041	1556	144	1027	18.5	66	0.85	-0.302441	84	6.98111
NM_017814	chr19	-	19091429	19110267	19092786	19093021	235	17	163	14.5	69.4	0.6	-0.349771	85	7.50819
NM_017660	chr19	+	19357641	19480741	19472938	19473307	369	26	247	14.1	66.9	0.63	-0.866456	86	7.32763
NM_032139	chr19	-	37779746	37857942	37788308	37788544	236	16	156	13.6	66.1	0.62	-0.577927	64	8.07255
NM_002333	chr19	+	38377438	38391607	38388029	38389138	1109	102	770	18.4	69.4	0.76	-0.243644	79.6667	6.48913
NM_014727	chr19	+	40900760	40921619	40906468	40906753	285	24	196	16.8	68.8	0.71	-0.336658	85	6.95852
NM_001281	chr19	+	41297727	41308689	41304182	41304772	590	53	408	18	69.2	0.76	-0.288319	80	7.03718
NM_015073	chr19	+	43089707	43390848	43264488	43265592	1104	107	763	19.4	69.1	0.81	-0.707823	75	8.70783
NM_001001716	chr19	+	44082454	44091374	44089716	44090140	424	34	287	16	67.7	0.7	-0.220523	81	7.03358
NM_002503	chr19	+	44082454	44091374	44089716	44090140	424	34	287	16	67.7	0.7	-0.220523	81	6.93238
NM_022752	chr19	+	47272129	47277560	47276786	47277057	271	19	171	14	63.1	0.71	-0.889534	84	7.02612
NM_002698	chr19	-	47284505	47328470	47291347	47292362	1015	69	681	13.6	67.1	0.6	-0.999674	84	6.1617
NM_133328	chr19	-	47394591	47413653	47395444	47395816	372	27	254	14.5	68.3	0.64	-0.490007	82	7.69014
NM_133444	chr19	+	47416331	47424193	47421256	47422201	945	63	610	13.3	64.6	0.66	-0.675847	82.1667	6.39397
NM_001410	chr19	+	47521600	47574761	47571477	47572128	651	51	441	15.7	67.7	0.69	-0.432696	84	7.91686
NM_145056	chr19	-	51842708	51856235	51843608	51844965	1357	181	972	26.7	71.6	1.04	-0.12705	80	6.8894
NM_016457	chr19	-	51869412	51912224	51873523	51873733	210	18	129	17.1	61.4	0.91	-1.21805	81	7.21463
NM_016457	chr19	-	51869412	51912224	51888978	51889240	262	19	175	14.5	66.8	0.65	-0.750203	82	7.21463
NM_001039885	chr19	+	51941142	51953672	51950649	51952064	1415	151	999	21.3	70.6	0.86	-0.0129084	82	8.52555
NM_015711	chr19	+	52803264	52898346	52874915	52876213	1298	113	915	17.4	70.5	0.72	-0.526283	78	6.95558
NM_015711	chr19	+	52803264	52898346	52896341	52897588	1247	129	880	20.7	70.6	0.86	-0.406721	80	6.95558
NM_014601	chr19	+	52908412	52938203	52920884	52921319	435	45	291	20.7	66.9	0.93	-0.736738	79	10.5322
NM_000234	chr19	-	53310514	53365372	53332530	53332826	296	24	202	16.2	68.2	0.7	-0.386635	82	7.46196
NM_153329	chr19	+	54648284	54666116	54659260	54659663	403	28	272	13.9	67.5	0.63	-0.471176	81	6.8723
NM_015953	chr19	-	54750779	54775615	54751386	54751987	601	51	409	17	68.1	0.74	-0.474958	78	7.29953
NM_021228	chr19	+	54837193	54853717	54846343	54848103	1760	186	1151	21.1	65.4	0.99	-0.323724	82	9.11121
NM_024298	chr19	-	59368918	59385545	59376288	59376688	400	42	293	21	73.2	0.83	-0.809503	70.5	9.03013
NM_001013	chr19	+	59396537	59403327	59402918	59403187	269	21	174	15.6	64.7	0.75	-0.654921	71	10.0142
NM_033113	chr19	+	60679510	60687666	60684389	60688728	4339	321	2894	14.8	66.7	0.67	-0.146113	84	6.27418
NM_152600	chr19	-	60780702	60784023	60781086	60781316	230	17	159	14.8	69.1	0.65	-0.014487	80	6.18436
NM_203374	chr19	-	60823918	60827753	60824851	60825678	827	74	545	17.9	65.9	0.83	-0.234525	83	7.49442
NM_013333	chr19	+	60878372	60898945	60888478	60888931	453	49	312	21.6	68.9	0.91	-0.227387	80	8.95852
NM_014347	chr19	+	63670274	63676577	63674141	63675324	1183	109	794	18.4	67.1	0.82	-0.730868	85	7.24521
NM_032792	chr19	-	63716708	63722733	63720164	63720751	587	59	398	20.1	67.8	0.88	-2.02557	81	7.80117
NM_016030	chr2	+	3362452	3462349	3370409	3371507	1098	117	746	21.3	67.9	0.93	-0.967428	67.75	7.60458
NM_002149	chr2	+	10360490	10485194	10477167	10477745	578	54	374	18.7	64.7	0.89	-0.420203	80	9.36078
NM_134421	chr2	+	10361276	10485194	10477167	10477745	578	54	374	18.7	64.7	0.89	-0.420203	80	9.42703
NM_003128	chr2	+	54536957	54752087	54709602	54709991	389	30	234	15.4	60.2	0.88	-0.872427	86	9.71929
NM_178313	chr2	+	54639034	54742949	54709602	54709991	389	30	234	15.4	60.2	0.88	-0.872427	86	7.37748
NM_181784	chr2	-	65391488	65513160	65394265	65394815	550	57	356	20.7	64.7	0.99	-0.230804	82	8.28563
NM_005270	chr2	+	121271336	121466699	121458576	121458866	290	22	193	15.2	66.6	0.69	-0.269247	83	7.77309
NM_005270	chr2	+	121271336	121466699	121462310	121463321	1011	125	753	24.7	74.5	0.9	-0.513376	83	7.77309
NM_000534	chr2	+	190357055	190450600	190394985	190395250	265	29	195	21.9	73.6	0.83	-0.249504	85	6.87594
NM_005876	chr2	+	220007943	220066598	220020942	220022338	1396	153	1036	21.9	74.2	0.8	-0.212469	84	7.81261
NM_024536	chr2	-	220111912	220116731	220112400	220113527	1127	74	746	13.1	66.2	0.6	-0.117339	82	8.99183
NM_014521	chr2	+	235525366	235629097	235616191	235616553	362	27	240	14.9	66.3	0.68	-0.0498526	79	9.37279
NM_006037	chr2	-	239634800	239987580	239694611	239694901	290	23	204	15.9	70.3	0.64	-0.145633	82	6.02041
NM_006037	chr2	-	239634800	239987580	239698084	239698390	306	26	210	17	68.6	0.73	-0.268143	84	6.02041
NM_025220	chr20	-	3596619	3610738	3601190	3602773	1583	151	1034	19.1	65.3	0.9	-0.0222923	80	9.09403
NM_178026	chr20	-	32896183	32924322	32910840	32911165	325	26	220	16	67.7	0.71	-0.0662876	84	7.32268
NM_178026	chr20	-	32896183	32924322	32914809	32915035	226	30	157	26.5	69.5	1.11	-0.150921	84	7.32268
NM_080627	chr20	-	34845592	34925501	34855603	34856181	578	38	368	13.1	63.7	0.65	-0.763179	84	6.15257
NM_005417	chr20	+	35406501	35467235	35464951	35465224	273	20	188	14.7	68.9	0.62	-0.268512	70	8.59091
NM_006698	chr20	-	35579233	35589747	35582017	35583550	1533	120	929	15.7	60.6	0.86	-1.1791	84	9.31741
NM_152897	chr20	+	43895876	43905321	43902695	43902974	279	24	181	17.2	64.9	0.82	-0.00906837	80	6.01583
NM_173091	chr20	-	49441171	49592665	49573097	49573947	850	74	586	17.4	68.9	0.75	-0.281171	82	6.1308
NM_001033521	chr20	+	54400833	54412989	54411931	54412178	247	20	144	16.2	58.3	0.96	-0.781617	81	8.96335
NM_003185	chr20	-	59983248	60074261	59987862	59988987	1125	87	756	15.5	67.2	0.69	-1.29362	66	6.57631
NM_003185	chr20	-	59983248	60074261	60061692	60062033	341	25	219	14.7	64.2	0.71	-0.335398	80	6.57631
NM_031215	chr20	-	60397080	60415734	60403162	60403506	344	25	231	14.5	67.2	0.65	-0.383339	83	6.23742
NM_007346	chr20	+	60906621	60915797	60913288	60913498	210	18	143	17.1	68.1	0.74	-0.0560809	84	7.47565
NM_033081	chr20	-	60979534	61039719	60982666	60984152	1486	98	951	13.2	64	0.64	-0.292599	84	6.3153
NM_001037335	chr20	-	61659882	61676036	61664410	61669429	5019	381	3418	15.2	68.1	0.66	-0.340248	84.5	6.05026
NM_012384	chr20	-	61689398	61728825	61691778	61692500	722	54	505	15	69.9	0.61	-0.114123	86	6.64732
NM_012384	chr20	-	61689398	61728825	61693674	61694049	375	27	239	14.4	63.7	0.71	-0.94015	86	6.64732
NM_032527	chr20	+	61809834	61837938	61836693	61836979	286	22	199	15.4	69.6	0.67	-0.0946366	81	6.55285
NM_017859	chr20	-	62041631	62058212	62042182	62043000	818	66	557	16.1	68.1	0.7	-0.305135	81	7.13295
NM_020713	chr20	-	62058498	62071662	62064237	62065410	1173	85	809	14.5	69	0.61	-1.00383	80	6.66066
NM_012469	chr20	+	62082874	62134897	62131405	62131796	391	28	252	14.3	64.5	0.69	-0.0379832	80	9.20854
NM_001039467	chr20	-	62174978	62181768	62175524	62176387	863	58	574	13.4	66.5	0.61	-0.305706	79	6.29672
NM_001001890	chr21	-	35081967	35182857	35086014	35086804	790	89	544	22.5	68.9	0.99	-0.442512	84	7.82442
NM_022115	chr21	-	42094393	42172660	42094543	42094911	368	24	226	13	61.4	0.74	-0.884029	77	6.31193
NM_022115	chr21	-	42094393	42172660	42109094	42109579	485	37	328	15.3	67.6	0.67	-0.131663	76	6.31193
NM_022115	chr21	-	42094393	42172660	42128545	42128791	246	28	164	22.8	66.7	1.03	-0.501014	77	6.31193
NM_199050	chr21	-	42178287	42219868	42200803	42201093	290	25	190	17.2	65.5	0.81	-0.0154705	86	7.6873
NM_000071	chr21	-	43346371	43369109	43350723	43351134	411	29	260	14.1	63.3	0.71	-0.159025	81	8.85323
NM_173354	chr21	-	43658826	43671430	43664547	43664878	331	27	235	16.3	71	0.65	-0.200009	79	6.53004
NM_015056	chr21	+	43903859	43940388	43938389	43938692	303	21	189	13.9	62.4	0.76	-0.582381	82	7.68537
NM_001037553	chr21	+	44169706	44231903	44187901	44188227	326	24	217	14.7	66.6	0.68	-0.739684	79	7.79806
NM_001037553	chr21	+	44169706	44231903	44226912	44227270	358	28	219	15.6	61.2	0.84	-0.59726	76	7.79806
NM_058190	chr21	+	45184382	45221316	45202706	45203073	367	27	249	14.7	67.8	0.64	-0.0193514	82	6.70768
NM_015834	chr21	+	45318920	45470906	45378034	45378840	806	82	561	20.3	69.6	0.91	-0.651406	85	6.23679
NM_030582	chr21	+	45699851	45758062	45719244	45720740	1496	108	996	14.4	66.6	0.65	-0.0960377	77.5	8.82773
NM_030582	chr21	+	45699851	45758062	45756509	45756815	306	28	214	18.3	69.9	0.75	-0.605677	79	8.82773
NM_001848	chr21	+	46226090	46249391	46246272	46248311	2039	160	1384	15.7	67.9	0.68	-0.412894	79	9.9893
NM_001849	chr21	+	46342460	46377191	46356327	46357249	922	76	613	16.5	66.5	0.75	-0.627002	76	9.41569
NM_058174	chr21	+	46342460	46374147	46356327	46357249	922	76	613	16.5	66.5	0.75	-0.627002	76	10.0746
NM_058175	chr21	+	46342460	46374147	46356327	46357249	922	76	613	16.5	66.5	0.75	-0.627002	76	10.1566
NM_001849	chr21	+	46342460	46377191	46369615	46370640	1025	88	667	17.2	65.1	0.81	-0.560344	75.3333	9.41569
NM_058174	chr21	+	46342460	46374147	46369615	46370640	1025	88	667	17.2	65.1	0.81	-0.560344	75.3333	10.0746
NM_058175	chr21	+	46342460	46374147	46369615	46370640	1025	88	667	17.2	65.1	0.81	-0.560344	75.3333	10.1566
NM_001849	chr21	+	46342460	46377191	46373366	46373855	489	40	329	16.4	67.3	0.74	-0.29712	76	9.41569
NM_058174	chr21	+	46342460	46374147	46373366	46373855	489	40	329	16.4	67.3	0.74	-0.29712	76	10.0746
NM_058175	chr21	+	46342460	46374147	46373366	46373855	489	40	329	16.4	67.3	0.74	-0.29712	76	10.1566
NM_001849	chr21	+	46342460	46377191	46376265	46377057	792	83	531	21	67	0.94	-0.261205	75	9.41569
NM_032261	chr21	-	46405490	46428801	46404920	46406493	1573	153	1074	19.5	68.3	0.83	-0.053902	77	6.46091
NM_006031	chr21	+	46568463	46690110	46633099	46633549	450	34	294	15.1	65.3	0.71	-0.222774	78	7.40032
NM_006031	chr21	+	46568463	46690110	46655961	46656359	398	35	275	17.6	69.1	0.74	-0.786274	76	7.40032
NM_001535	chr21	+	46879954	46909291	46892945	46893236	291	24	182	16.5	62.5	0.89	-0.170942	83	8.92389
NM_013373	chr22	+	18499364	18513974	18510396	18511298	902	72	635	16	70.4	0.67	-0.068779	80	6.54693
NM_003426	chr22	+	19078479	19092752	19089743	19090923	1180	98	759	16.6	64.3	0.81	-0.254685	78	6.07175
NM_153334	chr22	-	19108874	19122146	19109386	19110560	1174	141	819	24	69.8	0.99	-0.316333	78	7.17884
NM_153334	chr22	-	19108874	19122146	19113466	19116201	2735	248	1860	18.1	68	0.78	-0.251401	78	7.17884
NM_002073	chr22	+	21742668	21797221	21767921	21768431	510	43	326	16.9	63.9	0.84	-1.51353	62	7.78314
NM_012295	chr22	+	22737764	22904596	22881813	22882696	883	85	544	19.3	61.6	1.02	-0.0335407	84	7.28713
NM_001008566	chr22	-	25251713	25291370	25266996	25267672	676	58	462	17.2	68.3	0.74	-0.417058	81	8.58713
NM_002430	chr22	-	26474264	26527486	26522793	26528592	5799	515	3868	17.8	66.7	0.8	-0.343531	77	7.44227
NM_006932	chr22	+	29807304	29830609	29824658	29825175	517	41	350	15.9	67.7	0.71	-0.354243	85	6.81792
NM_134269	chr22	+	29807304	29830609	29824658	29825175	517	41	350	15.9	67.7	0.71	-0.354243	85	7.21985
NM_134270	chr22	+	29807304	29830609	29824658	29825175	517	41	350	15.9	67.7	0.71	-0.354243	85	6.85353
NM_001013436	chr22	+	35745647	35755809	35750171	35750846	675	89	483	26.4	71.6	1.03	-0.36902	83	6.80786
NM_021126	chr22	+	35745647	35755809	35750171	35750846	675	89	483	26.4	71.6	1.03	-0.36902	83	6.79849
NM_006358	chr22	-	39495584	39545338	39515143	39515362	219	21	150	19.2	68.5	0.82	-0.388675	87	6.55361
NM_003216	chr22	+	40107908	40125276	40121715	40122088	373	30	235	16.1	63	0.81	-0.807948	78	6.74332
NM_015140	chr22	-	41892571	41913051	41900005	41900266	261	21	176	16.1	67.4	0.72	-0.271804	86	6.73193
NM_001009880	chr22	-	43966786	44015314	43977385	43977744	359	26	237	14.5	66	0.66	-0.512034	82	7.55704
NM_001001928	chr22	+	44925162	45018317	44988788	44989453	665	54	413	16.2	62.1	1.07	-0.888621	84	7.42922
NM_014246	chr22	-	45135394	45311731	45149097	45149535	438	35	293	16	66.9	0.71	-0.571941	84	6.67824
NM_014246	chr22	-	45135394	45311731	45156370	45156593	223	25	164	22.4	73.5	0.83	-0.0823908	83.5	6.67824
NM_014246	chr22	-	45135394	45311731	45307981	45313525	5544	477	3493	17.2	63	0.87	-0.521692	78.125	6.67824
NM_022766	chr22	-	45458970	45512816	45460414	45460709	295	24	163	16.3	55.3	1.07	-1.1369	81.5	7.71358
NM_014346	chr22	+	45537212	45948388	45633577	45635088	1511	102	919	13.5	60.8	0.74	-0.620108	77	8.21748
NM_014838	chr22	+	48633500	48669730	48665572	48666380	808	65	503	16.1	62.3	0.83	-1.02435	83	7.22349
NM_024324	chr22	+	48698286	48707190	48702787	48703015	228	22	160	19.3	70.2	0.78	-0.0408028	80	8.17437
NM_014869	chr3	-	12913718	12983960	12915753	12916134	381	30	257	15.7	67.5	0.69	-0.0631365	83	8.0714
NM_014869	chr3	-	12913718	12983960	12951966	12953182	1216	87	782	14.3	64.3	0.69	-0.421947	82	8.0714
NM_003341	chr3	+	23822442	23907811	23826991	23827512	521	53	349	20.3	67	0.92	-0.498399	82	8.59706
NM_182666	chr3	+	23822442	23907811	23826991	23827512	521	53	349	20.3	67	0.92	-0.498399	82	8.55996
NM_006225	chr3	-	38023992	38046158	38040747	38041826	1079	74	729	13.7	67.6	0.63	-0.375959	83	7.00253
NM_014965	chr3	+	42176664	42229113	42218934	42219375	441	33	289	15	65.5	0.7	-0.0536742	69	7.08947
NM_032806	chr3	-	43095732	43122569	43096425	43096673	248	20	159	16.1	64.1	0.78	-0.112827	78	6.94512
NM_014966	chr3	+	47819402	47866689	47862829	47863154	325	23	215	14.2	66.2	0.65	-1.07559	82	7.94783
NM_032355	chr3	-	49921306	49942449	49922625	49923434	809	64	509	15.8	62.9	0.81	-0.910747	81	6.3236
NM_007184	chr3	+	52464563	52502128	52496714	52497652	938	68	602	14.5	64.2	0.72	-1.72652	82	7.92567
NM_001005158	chr3	-	52913666	53055110	53007853	53008156	303	22	198	14.5	65.3	0.69	-0.252479	85	7.06706
NM_003392	chr3	-	55474782	55496371	55483376	55483748	372	46	264	24.7	71	0.98	-0.646688	77	10.1197
NM_001457	chr3	+	57969166	58133022	58084140	58084409	269	24	171	17.8	63.6	0.89	-0.680041	86	10.165
NM_015642	chr3	-	115539636	116348817	115552412	115553345	933	82	590	17.6	63.2	0.88	-0.929211	78	6.78857
NM_004526	chr3	+	128799942	128823968	128806144	128806725	581	44	384	15.1	66.1	0.71	-1.03305	82	7.12498
NM_001010938	chr3	-	197074632	197106829	197079230	197079888	658	56	482	17	73.3	0.65	-0.414087	83	7.004
NM_005781	chr3	-	197074632	197120277	197079230	197079888	658	56	482	17	73.3	0.65	-0.414087	83	6.63572
NM_001010938	chr3	-	197074632	197106829	197083418	197083786	368	31	253	16.8	68.8	0.72	-0.313448	83	7.004
NM_005781	chr3	-	197074632	197120277	197083418	197083786	368	31	253	16.8	68.8	0.72	-0.313448	83	6.63572
NM_017733	chr4	+	482988	523320	519166	519556	390	31	264	15.9	67.7	0.7	-0.0999474	61.5	8.56507
NM_006315	chr4	+	689572	754427	714335	716070	1735	128	1213	14.8	69.9	0.61	-0.418353	82	6.3107
NM_006315	chr4	+	689572	754427	720282	721005	723	64	512	17.7	70.8	0.75	-0.0725259	80	6.3107
NM_006315	chr4	+	689572	754427	742029	743788	1759	186	1186	21.1	67.4	1.09	-0.708842	84	6.3107
NM_005255	chr4	-	833064	916174	833317	833936	619	44	390	14.2	63	0.72	-0.510096	85	7.2381
NM_005255	chr4	-	833064	916174	877190	878164	974	63	642	12.9	65.9	0.61	-1.37742	82	7.2381
NM_032326	chr4	+	916261	942443	941611	942249	638	51	438	16	68.7	0.68	-0.389945	79	6.07066
NM_000203	chr4	+	970784	988317	972814	974189	1375	115	947	16.7	68.9	0.7	-0.345599	85	6.97961
NM_000203	chr4	+	970784	988317	974926	975695	769	59	528	15.3	68.7	0.65	-0.23963	85	6.97961
NM_001004356	chr4	+	995609	1010686	1007524	1008938	1414	120	936	17	66.2	0.78	-0.49019	79	8.15925
NM_001012614	chr4	-	1195227	1232908	1199765	1200193	428	35	281	16.4	65.7	0.76	-0.871336	77	8.90151
NM_001012614	chr4	-	1195227	1232908	1208943	1209718	775	67	531	17.3	68.5	0.74	-0.211505	78	8.90151
NM_001012614	chr4	-	1195227	1232908	1211837	1212050	213	16	129	15	60.6	0.82	-0.54113	77	8.90151
NM_001012614	chr4	-	1195227	1232908	1214451	1214728	277	27	166	19.5	59.9	1.09	-0.808547	78.5	8.90151
NM_001017405	chr4	+	1273671	1323925	1294768	1295114	346	30	236	17.3	68.2	0.77	-0.179965	83	8.65561
NM_012318	chr4	-	1783003	1827772	1812878	1813150	272	21	171	15.4	62.9	0.78	-0.345705	80	7.14024
NM_005663	chr4	-	1954240	1980757	1957290	1958058	768	54	521	14.1	67.8	0.61	-0.584493	84	8.25576
NM_001119	chr4	+	2815381	2901587	2897851	2898069	218	17	139	15.6	63.8	0.77	-0.137499	83	10.1845
NM_002337	chr4	-	3484087	3504022	3486254	3486642	388	32	250	16.5	64.4	0.8	-1.1745	77.5	9.47142
NM_002337	chr4	-	3484087	3504022	3489362	3489946	584	44	377	15.1	64.6	0.73	-2.21378	74	9.47142
NM_020773	chr4	+	6962395	7085746	7077664	7078067	403	28	252	13.9	62.5	0.72	-0.314724	75	7.58081
NM_016531	chr4	+	38342184	38379524	38366703	38367000	297	21	187	14.1	63	0.73	-0.248096	82	7.23192
NM_020859	chr4	+	77575276	77923427	77880473	77882108	1635	148	1128	18.1	69	0.76	-0.482627	84	8.87023
NM_016619	chr4	-	84230234	84254935	84249654	84250333	679	64	473	18.9	69.7	0.78	-0.533531	84	6.97752
NM_025144	chr4	+	113437947	113583213	113552390	113552772	382	29	246	15.2	64.4	0.75	-0.798425	77	7.50631
NM_178835	chr4	-	146901337	147079057	146901960	146902267	307	24	195	15.6	63.5	0.79	-0.844147	80	7.28564
NM_016081	chr4	+	169654791	170086183	170035661	170036200	539	58	328	21.5	60.9	1.24	-0.78462	87	9.29335
NM_007277	chr5	+	496333	520409	517887	518666	779	68	534	17.5	68.5	0.75	-0.181932	72.5	8.7521
NM_007118	chr5	+	14196828	14562458	14540930	14541536	606	65	442	21.5	72.9	0.83	-1.1409	87	8.56627
NM_005654	chr5	+	92944798	92955542	92949243	92950253	1010	94	591	18.6	58.5	1.09	-0.739629	69	9.18483
NM_003687	chr5	+	131621249	131637044	131634917	131635788	871	75	592	17.2	68	0.76	-0.182859	84	6.19345
NM_002653	chr5	-	134391322	134397863	134390991	134393045	2054	174	1288	16.9	62.7	0.87	-0.699582	86	6.85557
NM_002653	chr5	-	134391322	134397863	134394812	134395337	525	51	361	19.4	68.8	0.83	-1.09509	86	6.85557
NM_001017995	chr5	-	171693109	171814132	171699027	171699431	404	28	262	13.9	64.9	0.66	-0.421126	82	8.44053
NM_052899	chr5	-	175955408	175969737	175956383	175957257	874	91	542	20.8	62	1.08	-0.0583558	76.75	6.70099
NM_022455	chr5	+	176493438	176659820	176625946	176626237	291	24	176	16.5	60.5	0.91	-0.45485	82	7.53775
NM_006816	chr5	-	176691169	176711491	176691677	176691967	290	26	202	17.9	69.7	0.75	-0.477073	84	9.68014
NM_004395	chr5	-	176816219	176833300	176826466	176827400	934	63	622	13.5	66.6	0.62	-1.00708	81	9.32495
NM_007255	chr5	+	176959724	176969950	176967957	176968266	309	25	211	16.2	68.3	0.7	-0.0636917	82	6.87796
NM_014275	chr5	-	179157204	179166558	179160889	179161609	720	65	488	18.1	67.8	0.79	-0.672227	79	7.44259
NM_001453	chr6	+	1555679	1559128	1549605	1560865	11260	763	6463	13.6	57.4	0.82	-0.997542	64	8.41517
NM_001069	chr6	-	3098900	3102782	3099103	3099745	642	58	416	18.1	64.8	0.86	-0.422728	82	9.42129
NM_178012	chr6	-	3169494	3172967	3169915	3170633	718	66	469	18.4	65.3	0.86	-0.343181	81	7.55295
NM_000332	chr6	-	16407321	16869700	16436148	16436542	394	30	267	15.2	67.8	0.66	-1.29927	80	8.4174
NM_030651	chr6	-	32224117	32227698	32224568	32225207	639	56	407	17.5	63.7	0.94	-0.23559	82	7.33566
NM_002224	chr6	+	33697138	33772326	33763944	33764216	272	20	175	14.7	64.3	0.72	-0.288334	84	7.82851
NM_000389	chr6	+	36754436	36763087	36759852	36760113	261	23	176	17.6	67.4	0.78	-0.658326	84	9.90072
NM_078467	chr6	+	36754464	36763087	36759852	36760113	261	23	176	17.6	67.4	0.78	-0.658326	84	10.0234
NM_002505	chr6	+	41148684	41178123	41176453	41177326	873	71	515	16.3	59	0.94	-0.771735	72	7.96714
NM_004370	chr6	-	75850761	75972343	75851600	75851808	208	28	152	26.9	73.1	1.01	-0.427947	85	10.0197
NM_004370	chr6	-	75850761	75972343	75968299	75968853	554	43	370	15.5	66.8	0.7	-0.0960145	86	10.0197
NM_015076	chr6	-	111037873	111243105	111073704	111074516	812	74	524	18.2	64.5	0.88	-0.439769	85	8.74412
NM_153746	chr6	+	157722544	158014965	157933800	157934244	444	29	283	13.1	63.7	0.64	-0.365555	86	7.57035
NM_003247	chr6	-	169357799	169396062	169373684	169374748	1064	82	697	15.4	65.5	0.72	-1.11767	72	10.3174
NM_003247	chr6	-	169357799	169396062	169390471	169390972	501	42	312	16.8	62.3	0.87	-0.309726	72.5	10.3174
NM_020223	chr7	+	288051	304059	290557	291071	514	35	327	13.6	63.6	0.67	-0.0430537	75	8.69677
NM_002607	chr7	-	503424	526007	516976	517207	231	22	153	19	66.2	0.88	-1.03698	79	6.31308
NM_002735	chr7	-	555359	718687	565615	565853	238	19	163	16	68.5	0.68	-0.0881236	72	8.05383
NM_017802	chr7	+	732863	792642	746765	747127	362	29	245	16	67.7	0.7	-0.598798	76	8.25891
NM_017802	chr7	+	732863	792642	758510	758764	254	25	160	19.7	63	0.99	-0.890523	77	8.25891
NM_017802	chr7	+	732863	792642	760743	761108	365	28	240	15.3	65.8	0.71	-1.04563	77	8.25891
NM_017802	chr7	+	732863	792642	762871	763452	581	41	355	14.1	61.1	0.76	-1.39811	77	8.25891
NM_017802	chr7	+	732863	792642	773862	774787	925	79	626	17.1	67.7	0.81	-0.626696	77	8.25891
NM_017802	chr7	+	732863	792642	788215	789160	945	131	626	27.7	66.2	1.29	-1.03321	79	8.25891
NM_025154	chr7	+	822777	881065	853329	854061	732	61	528	16.7	72.1	0.64	-0.0965741	83	8.18566
NM_025154	chr7	+	822777	881065	872134	872412	278	22	164	15.8	59	0.91	-1.01252	81	8.18566
NM_015949	chr7	+	882716	902597	897439	897741	302	26	213	17.2	70.5	0.7	-0.459549	80	7.60038
NM_015949	chr7	+	882716	902597	901557	902174	617	56	421	18.2	68.2	0.78	-1.35455	79	7.60038
NM_001039966	chr7	+	1092968	1099977	1098151	1099713	1562	106	984	13.6	63	0.69	-0.260864	80	6.37235
NM_001013836	chr7	-	1821953	2239109	1851559	1851928	369	42	231	22.8	62.6	1.19	-0.202502	82	7.01872
NM_001013836	chr7	-	1821953	2239109	1934190	1934520	330	26	220	15.8	66.7	0.78	-0.549491	71	7.01872
NM_001013836	chr7	-	1821953	2239109	1974328	1974794	466	35	296	15	63.5	0.77	-0.75803	70.3333	7.01872
NM_001013836	chr7	-	1821953	2239109	1993490	1993894	404	34	270	16.8	66.8	0.76	-0.542762	71	7.01872
NM_013321	chr7	-	2261164	2320625	2262879	2263775	896	72	612	16.1	68.3	0.69	-0.250887	82	6.401
NM_001037283	chr7	+	2360999	2386903	2386334	2386866	532	39	332	14.7	62.4	0.75	-0.327658	81	9.3642
NM_003751	chr7	+	2360999	2386903	2386334	2386866	532	39	332	14.7	62.4	0.75	-0.327658	81	9.21088
NM_018641	chr7	+	2409784	2440742	2438771	2440093	1322	130	870	19.7	65.8	0.91	-0.939108	81	6.61417
NM_001033518	chr7	+	5196360	5240012	5234274	5234636	362	30	240	16.6	66.3	0.77	-0.289088	84	7.01186
NM_032172	chr7	+	6111075	6167720	6159939	6161203	1264	141	908	22.3	71.8	0.87	-0.200136	82.5	7.45644
NM_004227	chr7	-	6167936	6278767	6176455	6177243	788	65	517	16.5	65.6	0.78	-0.26564	84	7.24833
NM_024067	chr7	+	6596439	6614880	6613409	6614481	1072	87	748	16.2	69.8	0.67	-0.336023	81	8.17983
NM_000168	chr7	-	41967074	42243143	41971592	41972646	1054	105	727	19.9	69	0.85	-0.723076	77	6.24883
NM_000168	chr7	-	41967074	42243143	42234071	42234348	277	31	168	22.4	60.6	1.24	-0.126253	65	6.24883
NM_172020	chr7	+	71987871	72056774	72051185	72051729	544	40	358	14.7	65.8	0.72	-0.311986	83	8.51127
NM_012453	chr7	-	72621209	72630949	72622926	72623144	218	18	141	16.5	64.7	0.79	-0.29356	83	9.35874
NM_003388	chr7	+	73341740	73458209	73390755	73391279	524	50	360	19.1	68.7	0.82	-0.00763553	80	8.04927
NM_003505	chr7	+	90731718	90736068	90731503	90734619	3116	276	1985	17.7	63.7	0.87	-1.91169	77.5	7.24745
NM_003496	chr7	+	98314048	98448802	98447605	98447995	390	28	242	14.4	62.1	0.75	-0.0544716	82	8.18784
NM_002319	chr7	-	100009569	100021712	100009084	100010222	1138	104	774	18.3	68	0.79	-0.78551	81	6.33372
NM_001913	chr7	+	101246011	101713970	101346122	101346345	223	20	123	17.9	55.2	1.19	-0.469552	71	8.23878
NM_181552	chr7	+	101247601	101680064	101346122	101346345	223	20	123	17.9	55.2	1.19	-0.469552	71	7.59621
NM_001913	chr7	+	101246011	101713970	101625451	101626317	866	66	547	15.2	63.2	0.77	-0.51195	77	8.23878
NM_181552	chr7	+	101247601	101680064	101625451	101626317	866	66	547	15.2	63.2	0.77	-0.51195	77	7.59621
NM_001913	chr7	+	101246011	101713970	101669314	101669715	401	29	262	14.5	65.3	0.68	-1.02836	81	8.23878
NM_181552	chr7	+	101247601	101680064	101669314	101669715	401	29	262	14.5	65.3	0.68	-1.02836	81	7.59621
NM_001913	chr7	+	101246011	101713970	101678385	101679354	969	105	678	21.7	70	0.89	-0.640746	83	8.23878
NM_181552	chr7	+	101247601	101680064	101678385	101679354	969	105	678	21.7	70	0.89	-0.640746	83	7.59621
NM_152411	chr7	-	148397665	148418802	148398893	148400123	1230	87	815	14.1	66.3	0.64	-0.502886	80.5	7.3799
NM_001001661	chr7	-	148430810	148454311	148432142	148433007	865	68	540	15.7	62.4	0.81	-2.02331	83	6.05881
NM_003575	chr7	+	148523509	148554272	148553842	148554128	286	22	187	15.4	65.4	0.73	-0.420834	79	7.30889
NM_152557	chr7	-	148800816	148825831	148802311	148802936	625	60	394	19.2	63	0.98	-0.714505	79	8.24501
NM_031946	chr7	+	150414758	150472456	150450852	150451697	845	74	590	17.5	69.8	0.73	-0.124822	78	7.67417
NM_058246	chr7	+	156822471	156902894	156895131	156895886	755	72	519	19.1	68.7	0.81	-0.0927111	77	9.35545
NM_018051	chr7	+	158342029	158431644	158405320	158405855	535	38	323	14.2	60.4	0.81	-0.650257	62	8.12783
NM_012154	chr8	-	141610445	141714828	141614703	141614931	228	18	143	15.8	62.7	0.8	-1.11603	83	7.53397
NM_173832	chr8	+	144400483	144416250	144403740	144404118	378	31	244	16.4	64.6	0.79	-0.54483	80	6.04184
NM_030895	chr8	+	144444933	144453495	144449305	144450650	1345	150	963	22.3	71.6	0.87	-0.231853	84.75	7.26246
NM_024736	chr8	+	144711619	144716372	144713752	144714275	523	46	382	17.6	73	0.66	-0.272718	80	7.9046
NM_003313	chr8	-	144765930	144770875	144767471	144767951	480	34	323	14.2	67.3	0.63	-1.38341	83	9.26864
NM_000445	chr8	-	145061308	145122901	145062258	145074123	11865	951	7914	16	66.7	0.73	-0.532027	82.8864	9.03454
NM_013291	chr8	-	145589253	145605541	145587622	145590683	3061	207	1990	13.5	65	0.65	-0.867731	77	8.03438
NM_013291	chr8	-	145589253	145605541	145593787	145594133	346	27	240	15.6	69.4	0.66	-0.143303	75	8.03438
NM_025251	chr8	-	145725370	145809696	145741551	145741973	422	33	275	15.6	65.2	0.74	-1.08181	81	6.14771
NM_025251	chr8	-	145725370	145809696	145801507	145802020	513	40	323	15.6	63	0.79	-0.725507	78	6.14771
NM_152629	chr9	-	3814127	4142183	4107825	4108594	769	64	484	16.6	62.9	0.84	-0.324856	79	7.46249
NM_001003800	chr9	-	94513465	94566904	94520666	94521407	741	54	491	14.6	66.3	0.66	-1.11226	79	8.11808
NM_032552	chr9	+	123369219	123587630	123574800	123575433	633	45	411	14.2	64.9	0.67	-0.0634198	83	7.89594
NM_138709	chr9	+	123544884	123584753	123574800	123575433	633	45	411	14.2	64.9	0.67	-0.0634198	83	8.15183
NM_020946	chr9	-	125181753	125732238	125194047	125194383	336	28	189	16.7	56.2	1.06	-0.158067	75	7.09296
NM_013443	chr9	-	129687421	129701692	129692747	129692981	234	19	149	16.2	63.7	0.8	-0.317772	80	8.76381
NM_175039	chr9	-	129709985	129719126	129714367	129714779	412	34	270	16.5	65.5	0.77	-0.35278	78.5	6.3522
NM_175040	chr9	-	129709985	129719126	129714367	129714779	412	34	270	16.5	65.5	0.77	-0.35278	78.5	6.52586
NM_019594	chr9	+	130684211	130720138	130709703	130710913	1210	80	715	13.2	59.1	0.76	-1.33123	82	7.24692
NM_001008563	chr9	+	131637577	131683928	131670145	131670644	499	40	334	16	66.9	0.73	-0.632496	84	6.90595
NM_006676	chr9	+	131637516	131683928	131670145	131670644	499	40	334	16	66.9	0.73	-0.632496	84	6.40195
NM_031432	chr9	-	133389004	133396483	133394138	133394381	243	24	164	19.8	67.5	0.87	-0.636075	82	7.35151
NM_007371	chr9	-	135885271	135922962	135902842	135903520	678	52	446	15.3	65.8	0.71	-0.366465	82	9.33908
NM_007371	chr9	-	135885271	135922962	135908964	135909197	233	19	156	16.3	67	0.75	-1.00375	82	9.33908
NM_000093	chr9	+	136673472	136876509	136849783	136850112	329	24	217	14.6	66	0.68	-0.454471	74	6.52826
NM_015447	chr9	-	137840153	137938826	137849597	137850920	1323	104	822	15.7	62.1	0.83	-0.669627	80	7.3308
NM_144653	chr9	-	138043023	138126952	138081291	138083842	2551	213	1732	16.7	67.9	0.73	-0.0918984	79	6.34635
NM_144653	chr9	-	138043023	138126952	138106469	138107288	819	54	523	13.2	63.9	0.65	-0.574064	83	6.34635
NM_181701	chr9	-	138238003	138277508	138268237	138268473	236	18	151	15.3	64	0.75	-0.46857	85	8.42084
NM_001039707	chr9	-	138416194	138424875	138421361	138421668	307	27	197	17.6	64.2	0.86	-0.899378	85	7.76997
NM_015160	chr9	+	138424936	138438034	138437283	138438352	1069	72	653	13.5	61.1	0.73	-0.873822	85	8.36222
NM_019892	chr9	-	138442892	138454077	138446101	138447114	1013	76	684	15	67.5	0.66	-0.0888517	84	7.05482
NM_017617	chr9	-	138508716	138560059	138511223	138511808	585	47	403	16.1	68.9	0.68	-0.192975	84	7.23381
NM_017617	chr9	-	138508716	138560059	138516026	138516861	835	65	581	15.6	69.6	0.65	-0.107734	84	7.23381
NM_017617	chr9	-	138508716	138560059	138518861	138520209	1348	111	931	16.5	69.1	0.69	-0.240715	85	7.23381
NM_017617	chr9	-	138508716	138560059	138520699	138521390	691	57	475	16.5	68.7	0.7	-0.66337	85	7.23381
NM_017617	chr9	-	138508716	138560059	138522509	138522722	213	17	142	16	66.7	0.72	-0.139819	85	7.23381
NM_017617	chr9	-	138508716	138560059	138528766	138529066	300	22	200	14.7	66.7	0.66	-0.915373	86	7.23381
NM_017617	chr9	-	138508716	138560059	138529545	138530040	495	38	340	15.4	68.7	0.65	-0.638422	86	7.23381
NM_021138	chr9	+	138900785	138940888	138922238	138922645	407	33	271	16.2	66.6	0.73	-1.01686	83	6.46162
NM_021138	chr9	+	138900785	138940888	138923825	138924158	333	24	225	14.4	67.6	0.64	-0.98916	83	6.46162
NM_018998	chr9	-	138954707	138958994	138955237	138959261	4024	303	2684	15.1	66.7	0.68	-0.568623	82.5	8.23985
NM_001606	chr9	-	139021506	139042561	139024256	139024632	376	39	260	20.7	69.1	0.88	-0.734911	82	7.35983
NM_001606	chr9	-	139021506	139042561	139031330	139032607	1277	87	816	13.6	63.9	0.67	-0.585944	80	7.35983
NM_001606	chr9	-	139021506	139042561	139036999	139037313	314	26	217	16.6	69.1	0.7	-0.170065	80	7.35983
NM_017723	chr9	+	139292100	139296914	139292434	139295926	3492	344	2451	19.7	70.2	0.8	-0.551338	79.5	8.79549
NM_024757	chr9	+	139633264	139850397	139828673	139828887	214	19	139	17.8	65	0.84	-0.450358	66	7.25928
NM_012227	chrX	-	161425	170887	167531	168511	980	81	665	16.5	67.9	0.72	-0.767451	70	6.96579
NM_013239	chrX	-	214969	267627	211398	215968	4570	310	3039	13.6	66.5	0.61	-0.711648	63	6.78969
NM_013239	chrX	-	214969	267627	218171	218549	378	34	245	18	64.8	0.86	-0.452595	62	6.78969
NM_013239	chrX	-	214969	267627	219012	219910	898	75	512	16.7	57	1.03	-0.699075	61.5	6.78969
NM_013239	chrX	-	214969	267627	221585	228671	7086	563	4705	15.9	66.4	0.73	-0.59326	61.1	6.78969
NM_013239	chrX	-	214969	267627	231035	232001	966	76	644	15.7	66.7	0.73	-0.5821	63	6.78969
NM_013239	chrX	-	214969	267627	232986	233626	640	53	405	16.6	63.3	0.83	-0.347506	63	6.78969
NM_013239	chrX	-	214969	267627	238668	239872	1204	103	799	17.1	66.4	0.78	-0.496893	66.5	6.78969
NM_013239	chrX	-	214969	267627	241990	242415	425	39	273	18.4	64.2	0.9	-0.683843	68	6.78969
NM_004729	chrX	-	2414454	2429008	2416770	2418703	1933	133	1226	13.8	63.4	0.69	-1.27433	68.8333	7.00373
NM_145177	chrX	-	2147552	2429015	2416770	2418703	1933	133	1226	13.8	63.4	0.69	-1.27433	68.8333	6.9499
NM_015884	chrX	+	21767576	21813461	21784182	21784746	564	45	339	16	60.1	0.91	-1.68513	70	8.58458
NM_015884	chrX	+	21767576	21813461	21785299	21785559	260	19	143	14.6	55	0.98	-0.176043	70	8.58458
NM_017745	chrX	-	39795442	39841663	39838378	39854191	15813	1121	9393	14.2	59.4	0.8	-0.198935	65	8.44035
NM_020871	chrX	-	114251438	114374891	114330162	114333451	3289	263	2144	16	65.2	0.75	-0.647357	81.625	6.43238
NM_017514	chrX	+	153339816	153355178	153348812	153349038	226	18	154	15.9	68.1	0.69	-0.307228	79	7.58
NM_000132	chrX	-	153717257	153904192	153766318	153766760	442	42	292	19	66.1	0.87	-1.11588	79	6.21524

## Sheet: Supplementary_table 5
Supplementary table 5: Candidate replicate origins in GM06990 lymphoblasts
GM06990															*; averaged in CGI
refseq_id	chr	strand	txStart	txEnd	CGI_start	CGI_end	CGI_length	Number of CpG	Number of G+C	CpG percentage	G+C percentage	Obs/exp	Average methylation*	Average replication*	Expression status
NM_198576	chr1	+	945365	981355	965359	970168	4809	351	3126	14.6	65	0.69	-1.13546	83	7.19155
NM_016176	chr1	-	1142150	1157310	1153365	1153758	393	34	277	17.3	70.5	0.7	-0.0602915	84	8.48197
NM_016547	chr1	-	1142150	1157310	1153365	1153758	393	34	277	17.3	70.5	0.7	-0.0602915	84	8.3465
NM_058167	chr1	-	1179154	1199097	1179259	1180108	849	68	567	16	66.8	0.72	-0.84736	83	6.22967
NM_058167	chr1	-	1179154	1199097	1193029	1193460	431	31	274	14.4	63.6	0.72	-0.114448	83	6.22967
NM_018188	chr1	+	1437385	1459930	1442564	1443062	498	40	340	16.1	68.3	0.69	-0.0376805	79	8.71455
NM_018188	chr1	+	1437385	1459930	1445165	1445755	590	48	408	16.3	69.2	0.69	-0.198966	79	8.71455
NM_018188	chr1	+	1437385	1459930	1447817	1448892	1075	77	721	14.3	67.1	0.64	-0.032579	79	8.71455
NM_023018	chr1	-	1672530	1699769	1675233	1675831	598	48	401	16.1	67.1	0.72	-0.121358	85	8.63576
NM_003036	chr1	+	2149993	2231511	2225168	2225527	359	30	251	16.7	69.9	0.69	-0.00565846	82	8.21323
NM_003036	chr1	+	2149993	2231511	2226302	2228929	2627	206	1718	15.7	65.4	0.73	-0.440237	82.1	8.21323
NM_007033	chr1	+	2313073	2326741	2323410	2324032	622	43	390	13.8	62.7	0.72	-0.413243	78	8.85065
NM_003039	chr1	-	9019593	9052474	9021867	9023100	1233	105	864	17	70.1	0.69	-0.123684	81	7.49159
NM_001009566	chr1	-	9711665	9807137	9712879	9713291	412	32	272	15.5	66	0.72	-0.496078	85	8.40297
NM_001009566	chr1	-	9711665	9807137	9745163	9745404	241	19	161	15.8	66.8	0.73	-0.167836	85	8.40297
NM_001066	chr1	+	12149646	12191864	12174172	12174572	400	35	275	17.5	68.8	0.76	-0.0385684	82	9.17702
NM_003443	chr1	-	16140950	16175214	16143178	16144169	991	82	678	16.5	68.4	0.71	-0.103839	84	6.60817
NM_001397	chr1	-	21416326	21489569	21424161	21424518	357	32	227	17.9	63.6	0.89	-0.0962823	85	8.89665
NM_018207	chr1	-	33383590	33420258	33385563	33385908	345	26	220	15.1	63.8	0.74	-0.263263	85	6.55045
NM_018207	chr1	-	33383590	33420258	33397846	33398114	268	24	184	17.9	68.7	0.76	-0.149497	85	6.55045
NM_152493	chr1	+	33494760	33538907	33514361	33514968	607	49	405	16.1	66.7	0.73	-0.165744	82	7.52516
NM_152493	chr1	+	33494760	33538907	33518328	33518577	249	20	170	16.1	68.3	0.73	-0.40192	81	7.52516
NM_018067	chr1	+	36394389	36419028	36414343	36415048	705	73	485	20.7	68.8	0.88	-0.0037752	84	9.00745
NM_001852	chr1	-	40538749	40555526	40541773	40542458	685	55	437	16.1	63.8	0.79	-0.120892	83	8.17296
NM_001009955	chr1	-	54464782	54644680	54496284	54496607	323	27	205	16.7	63.5	0.9	-0.595529	77	9.47592
NM_018070	chr1	-	54464782	54644567	54496284	54496607	323	27	205	16.7	63.5	0.9	-0.595529	77	9.38733
NM_145716	chr1	-	54464782	54644567	54496284	54496607	323	27	205	16.7	63.5	0.9	-0.595529	77	9.28827
NM_015149	chr1	+	181871830	182164289	182040816	182041039	223	26	135	23.3	60.5	1.28	-0.0700665	83	7.8458
NM_145214	chr1	-	226647999	226661140	226649051	226649517	466	32	306	13.7	65.7	0.64	-0.908578	63	7.67954
NM_030645	chr1	-	247071273	247086777	247072718	247073140	422	43	305	20.4	72.3	0.78	-0.00415558	81	7.15263
NM_018027	chr10	-	13725711	14412872	13738568	13739546	978	97	642	19.8	65.6	0.92	-0.11691	75	7.58711
NM_030912	chr10	+	104394241	104408066	104406545	104407155	610	45	415	14.8	68	0.65	-0.169413	84	8.2479
NM_033397	chr10	-	106061888	106083653	106064955	106065358	403	27	262	13.4	65	0.63	-0.529111	69	7.28158
NM_003750	chr10	-	120784530	120830324	120791651	120792216	565	39	343	13.8	60.7	0.81	-0.195223	86	7.6649
NM_030783	chr11	+	440279	481387	450468	450715	247	20	161	16.2	65.2	0.77	-0.367994	84	6.35117
NM_012305	chr11	+	915840	1002240	933737	934142	405	30	247	14.8	61	0.96	-0.498699	84	6.3869
NM_012305	chr11	+	915840	1002240	997921	998343	422	31	283	14.7	67.1	0.66	-0.711004	80	6.3869
NM_019009	chr11	-	1252176	1287415	1272043	1273691	1648	113	974	13.7	59.1	0.79	-0.287493	63.5	7.02409
NM_005969	chr11	-	2922235	2970183	2922361	2922678	317	23	206	14.5	65	0.69	-0.159542	74	9.17136
NM_003646	chr11	+	46325531	46358680	46344481	46345111	630	48	451	15.2	71.6	0.61	-0.684693	84	7.44905
NM_003120	chr11	-	47332984	47356703	47333227	47333812	585	53	418	18.1	71.5	0.71	-1.33356	80	8.90637
NM_000932	chr11	+	63775697	63791604	63782489	63783312	823	55	546	13.4	66.3	0.61	-0.218043	84	6.96936
NM_013265	chr11	+	64620258	64635756	64631710	64632819	1109	95	793	17.1	71.5	0.67	-0.066604	83	7.83778
NM_020680	chr11	+	65049123	65062758	65062511	65065078	2567	262	1779	20.4	69.3	0.85	-0.592828	82	7.89876
NM_006747	chr11	+	65162153	65174967	65166212	65166703	491	45	335	18.3	68.2	0.79	-0.316065	83	6.96867
NM_006747	chr11	+	65162153	65174967	65170354	65171779	1425	150	1012	21.1	71	0.84	-0.0682369	83	6.96867
NM_002896	chr11	+	66162713	66170516	66167501	66168163	662	47	360	14.2	54.4	0.96	-0.508341	83	9.67735
NM_000920	chr11	-	66372572	66482423	66380196	66383190	2994	239	1955	16	65.3	0.75	-0.0666976	84	6.00121
NM_004910	chr11	-	67015815	67029419	67016989	67019291	2302	162	1535	14.1	66.7	0.64	-0.725587	83	7.25617
NM_002335	chr11	+	67836683	67973319	67871893	67872302	409	34	265	16.6	64.8	0.79	-0.112529	82	6.13254
NM_002335	chr11	+	67836683	67973319	67962501	67962702	201	18	131	17.9	65.2	0.85	-0.0220219	83	6.13254
NM_139075	chr11	+	68572925	68614648	68606473	68607127	654	56	341	17.1	52.1	1.26	-0.623684	70	7.51781
NM_014786	chr11	+	72697310	72758072	72731296	72731950	654	68	425	20.8	65	1	-0.41326	84	6.52067
NM_001235	chr11	+	74950817	74961494	74955014	74955680	666	65	446	19.5	67	0.87	-0.127696	84	6.79349
NM_014770	chr12	-	56405260	56422207	56416095	56416628	533	42	348	15.8	65.3	0.76	-0.299865	82	8.61473
NM_015002	chr12	-	116065967	116112683	116077736	116078082	346	31	232	17.9	67.1	0.8	-0.0104051	81	6.24253
NM_006861	chr12	-	119017281	119039026	119021023	119021334	311	22	183	14.1	58.8	0.85	-0.011392	81	8.00595
NM_001005366	chr12	-	120351281	120502747	120375141	120375527	386	43	275	22.3	71.2	0.88	-0.247258	85	9.11361
NM_006312	chr12	-	123374913	123586102	123375269	123376097	828	56	557	13.5	67.3	0.6	-0.230721	69	8.29942
NM_006312	chr12	-	123374913	123586102	123386972	123387546	574	52	363	18.1	63.2	0.95	-0.543123	70	8.29942
NM_080626	chr12	+	124044146	124076302	124075522	124075768	246	25	158	20.3	64.2	0.99	-0.0292693	84	7.48896
NM_015409	chr12	+	131000460	131130958	131086278	131086900	622	41	355	13.2	57.1	0.81	-2.07548	77	7.53915
NM_138575	chr12	+	131797465	131805823	131804161	131804951	790	65	514	16.5	65.1	0.78	-0.545782	70	7.09458
NM_005895	chr12	-	131855567	131915361	131859736	131860071	335	26	226	15.5	67.5	0.68	-0.935949	68	8.24533
NM_000321	chr13	+	47775883	47954027	47788958	47789550	592	42	388	14.2	65.5	0.66	-0.626368	82	8.26475
NM_015205	chr13	+	112392643	112589483	112398479	112399512	1033	69	686	13.4	66.4	0.61	-1.90431	75	6.02102
NM_015205	chr13	+	112392643	112589483	112458005	112458363	358	34	223	19	62.3	1	-0.485914	70	6.02102
NM_015205	chr13	+	112392643	112589483	112512192	112512414	222	19	139	17.1	62.6	0.89	-0.0389578	71	6.02102
NM_015205	chr13	+	112392643	112589483	112540487	112540837	350	25	218	14.3	62.3	0.74	-0.382729	63	6.02102
NM_015205	chr13	+	112392643	112589483	112545297	112545662	365	29	231	15.9	63.3	0.8	-0.408035	63.5	6.02102
NM_007111	chr13	+	113287056	113343787	113335534	113335817	283	20	152	14.1	53.7	1.03	-1.12311	75	10.0784
NM_007368	chr13	-	113765295	113916197	113859020	113859682	662	100	474	30.2	71.6	1.18	-0.533137	78	7.17871
NM_024832	chr14	+	92049877	92225087	92223031	92224512	1481	124	937	16.7	63.3	0.84	-0.108779	83	6.32389
NM_024071	chr14	+	103251897	103269752	103263654	103264380	726	62	485	17.1	66.8	0.77	-0.628954	84	7.21182
NM_015316	chr14	-	103269840	103383680	103274823	103275082	259	20	167	15.4	64.5	0.75	-0.149731	85	6.99085
NM_001014431	chr14	-	104306731	104333125	104322446	104322662	216	19	157	17.6	72.7	0.7	-0.21037	82	8.52913
NM_001519	chr14	-	104746669	104838374	104785536	104787370	1834	158	1060	17.2	57.8	1.03	-0.391737	84	7.0029
NM_004689	chr14	+	104957230	105008102	105001287	105002557	1270	89	834	14	65.7	0.65	-0.394086	84	8.56989
NM_198525	chr15	-	87972204	87999686	87972669	87972908	239	18	163	15.1	68.2	0.66	-0.136317	81	6.62959
NM_198525	chr15	-	87972204	87999686	87992482	87993621	1139	107	719	18.8	63.1	0.94	-0.494936	82	6.62959
NM_198526	chr15	+	88345755	88426435	88411404	88412610	1206	87	800	14.4	66.3	0.66	-1.02203	83	6.38795
NM_181050	chr16	-	277440	342465	287028	287417	389	28	264	14.4	67.9	0.66	-1.09174	83	7.04715
NM_181050	chr16	-	277440	342465	294244	294447	203	29	142	28.6	70	1.21	-0.0988603	82	7.04715
NM_021259	chr16	-	360776	371951	363872	364424	552	39	367	14.1	66.5	0.64	-0.131907	82	7.55816
NM_005632	chr16	+	517856	544637	527568	528173	605	53	399	17.5	66	0.81	-0.502851	83	7.03865
NM_003345	chr16	+	1299638	1315391	1303814	1304497	683	46	431	13.5	63.1	0.68	-0.148815	82	10.0016
NM_194259	chr16	+	1299638	1315391	1303814	1304497	683	46	431	13.5	63.1	0.68	-0.148815	82	6.63822
NM_194260	chr16	+	1299361	1315391	1303814	1304497	683	46	431	13.5	63.1	0.68	-0.148815	82	10.0207
NM_194261	chr16	+	1299180	1315391	1303814	1304497	683	46	431	13.5	63.1	0.68	-0.148815	82	9.93886
NM_032520	chr16	+	1341932	1353353	1351893	1352369	476	39	323	16.4	67.9	0.71	-0.282942	81	6.83275
NM_020825	chr16	+	1604641	1667908	1645867	1646245	378	28	259	14.8	68.5	0.63	-0.337293	78	7.11262
NM_015133	chr16	+	1696221	1760319	1736811	1737230	419	32	284	15.3	67.8	0.67	-0.948719	83	6.62017
NM_000548	chr16	+	2037990	2078714	2065660	2065996	336	23	228	13.7	67.9	0.62	-0.470428	83	8.76186
NM_000296	chr16	-	2078711	2125900	2079804	2082171	2367	173	1529	14.6	64.6	0.7	-0.110911	83	6.54832
NM_000296	chr16	-	2078711	2125900	2089843	2090524	681	50	451	14.7	66.2	0.67	-0.331996	84	6.54832
NM_002613	chr16	+	2527970	2593190	2573480	2573921	441	35	287	15.9	65.1	0.75	-0.922871	84	8.21068
NM_018992	chr16	+	2672495	2699030	2697536	2697912	376	30	242	16	64.4	0.77	-0.34445	81	8.95888
NM_016333	chr16	+	2742330	2761414	2752267	2752575	308	24	194	15.6	63	0.79	-0.263204	86	8.97409
NM_016333	chr16	+	2742330	2761414	2755576	2756796	1220	105	720	17.2	59	1.03	-0.411076	85	8.97409
NM_004220	chr16	+	3125057	3132805	3132182	3132670	488	34	310	13.9	63.5	0.84	-0.0553053	83	7.89196
NM_018119	chr16	+	22216241	22252844	22244649	22245077	428	31	264	14.5	61.7	0.76	-0.828337	81	8.65261
NM_005115	chr16	+	29739287	29766842	29763404	29763696	292	20	188	13.7	64.4	0.66	-0.150824	83	7.54404
NM_153337	chr16	-	49257711	49272765	49264792	49265542	750	74	513	19.7	68.4	0.84	-0.389476	80	6.95629
NM_182854	chr16	-	49264386	49272765	49264792	49265542	750	74	513	19.7	68.4	0.84	-0.389476	80	6.02909
NM_020465	chr16	+	57055049	57105024	57092541	57093097	556	41	372	14.7	66.9	0.66	-0.19465	81	7.08178
NM_022910	chr16	+	57056265	57105024	57092541	57093097	556	41	372	14.7	66.9	0.66	-0.19465	81	7.22447
NM_013241	chr16	-	65820792	65838926	65828360	65828796	436	37	282	17	64.7	0.81	-1.02448	84	8.22233
NM_001013838	chr16	+	66236530	66248973	66239476	66241425	1949	128	1177	13.1	60.4	0.72	-0.224283	85	8.40918
NM_014062	chr16	-	68333274	68346330	68333589	68333895	306	24	186	15.7	60.8	0.85	-0.644157	84	9.69135
NM_017869	chr16	+	86542538	86668425	86610274	86610841	567	55	379	19.4	66.8	0.9	-0.0541556	83.5	6.07702
NM_079837	chr16	+	86542538	86668425	86610274	86610841	567	55	379	19.4	66.8	0.9	-0.0541556	83.5	6.22027
NM_017869	chr16	+	86542538	86668425	86658974	86659412	438	30	282	13.7	64.4	0.66	-0.107426	81	6.07702
NM_079837	chr16	+	86542538	86668425	86658974	86659412	438	30	282	13.7	64.4	0.66	-0.107426	81	6.22027
NM_017869	chr16	+	86542538	86668425	86667424	86668036	612	55	410	18	67	0.8	-0.0466209	82	6.07702
NM_079837	chr16	+	86542538	86668425	86667424	86668036	612	55	410	18	67	0.8	-0.0466209	82	6.22027
NM_005187	chr16	-	87468767	87570902	87480720	87480946	226	24	158	21.2	69.9	0.87	-0.0573308	84	8.40475
NM_013275	chr16	-	87861535	88084470	87872964	87876022	3058	235	2021	15.4	66.1	0.71	-0.217683	84	6.16556
NM_182705	chr17	-	289998	295959	293043	293560	517	39	335	15.1	64.8	0.73	-0.0386318	77	6.07247
NM_001092	chr17	-	853508	959074	856731	857192	461	50	339	21.7	73.5	0.81	-0.0804345	80	7.66493
NM_001092	chr17	-	853508	959074	862486	862729	243	21	165	17.3	67.9	0.75	-0.384356	81	7.66493
NM_001092	chr17	-	853508	959074	881167	881838	671	59	439	17.6	65.4	0.82	-0.0267127	78	7.66493
NM_001092	chr17	-	853508	959074	898496	899015	519	50	346	19.3	66.7	0.88	-0.642824	80	7.66493
NM_001092	chr17	-	853508	959074	922342	922652	310	26	212	16.8	68.4	0.76	-2.5	81	7.66493
NM_152348	chr17	+	1566566	1588643	1583803	1584242	439	42	299	19.1	68.1	0.83	-0.14767	85	6.07218
NM_015229	chr17	-	2539429	2561677	2541674	2543024	1350	105	892	15.6	66.1	0.71	-0.397628	81	9.35583
NM_015229	chr17	-	2539429	2561677	2545001	2545550	549	37	360	13.5	65.6	0.63	-0.358057	81	9.35583
NM_015229	chr17	-	2539429	2561677	2547725	2548730	1005	89	675	17.7	67.2	0.79	-0.068747	81	9.35583
NM_005964	chr17	-	8318254	8474761	8320897	8321264	367	28	226	15.3	61.6	0.81	-0.582068	86	8.1584
NM_014308	chr17	-	8722958	8756559	8732195	8732729	534	35	350	13.1	65.5	0.61	-0.281639	83	8.22087
NM_002018	chr17	-	18088877	18102780	18091004	18091897	893	63	541	14.1	60.6	0.77	-0.412039	85	8.94815
NM_001030006	chr17	+	30938394	31077549	30947701	30948257	556	53	394	19.1	70.9	0.76	-1.75978	83	8.5577
NM_007026	chr17	+	32924063	32947701	32946835	32947139	304	21	176	13.8	57.9	0.82	-0.720531	81	6.82675
NM_012232	chr17	-	37807994	37828864	37810158	37811063	905	97	591	21.4	65.3	1.01	-0.0736226	83	6.99772
NM_005892	chr17	+	40655074	40680466	40674212	40675026	814	62	554	15.2	68.1	0.67	-0.274582	82	7.95338
NM_003204	chr17	+	43480684	43493906	43491648	43491968	320	28	206	17.5	64.4	0.85	-0.285557	84	10.0691
NM_207346	chr17	+	71024203	71032415	71029608	71029978	370	32	253	17.3	68.4	0.74	-0.686073	84	7.33961
NM_006640	chr17	+	72827191	73008273	72909879	72910122	243	24	169	19.8	69.5	0.82	-0.206766	82	9.21393
NM_138793	chr17	-	74499392	74517494	74501237	74501634	397	39	253	19.6	63.7	0.97	-0.302479	78	8.32379
NM_138793	chr17	-	74499392	74517494	74504968	74505214	246	18	162	14.6	65.9	0.71	-0.52559	80	8.32379
NM_003655	chr17	-	75421549	75427808	75420461	75423641	3180	225	1972	14.2	62	0.74	-0.205317	76	7.24604
NM_020914	chr17	+	75849261	75984680	75936056	75936582	526	38	305	14.4	58	0.86	-0.150829	82	6.41006
NM_020761	chr17	+	76133219	76554768	76410673	76410987	314	24	201	15.3	64	0.79	-0.76759	77	6.24633
NM_020761	chr17	+	76133219	76554768	76463996	76465528	1532	123	1039	16.1	67.8	0.7	-0.21363	78.3333	6.24633
NM_020761	chr17	+	76133219	76554768	76536492	76536828	336	26	226	15.5	67.3	0.69	-0.584965	78	6.24633
NM_020761	chr17	+	76133219	76554768	76551206	76551485	279	20	179	14.3	64.2	0.7	-0.308358	81	6.24633
NM_014984	chr17	-	76777987	76811346	76778983	76779779	796	56	550	14.1	69.1	0.61	-0.0270935	81	6.07564
NM_024083	chr17	+	77528714	77568571	77537902	77538626	724	53	478	14.6	66	0.71	-0.0236273	83	6.58413
NM_004104	chr17	-	77629502	77649395	77630012	77630763	751	56	490	14.9	65.2	0.7	-0.422463	85	8.80025
NM_001893	chr17	-	77795528	77824862	77796088	77796578	490	39	315	15.9	64.3	0.78	-0.626404	83	9.53366
NM_139062	chr17	-	77795528	77824862	77796088	77796578	490	39	315	15.9	64.3	0.78	-0.626404	83	9.53973
NM_001893	chr17	-	77795528	77824862	77799978	77800216	238	22	161	18.5	67.6	0.82	-0.633214	83	9.53366
NM_139062	chr17	-	77795528	77824862	77799978	77800216	238	22	161	18.5	67.6	0.82	-0.633214	83	9.53973
NM_001893	chr17	-	77795528	77824862	77804935	77806431	1496	139	1043	18.6	69.7	0.77	-0.240726	83	9.53366
NM_139062	chr17	-	77795528	77824862	77804935	77806431	1496	139	1043	18.6	69.7	0.77	-0.240726	83	9.53973
NM_006788	chr18	+	9465529	9528106	9468452	9468920	468	39	298	16.7	63.7	0.82	-0.335708	85	9.224
NM_032525	chr18	+	12298256	12316568	12315040	12316049	1009	79	639	15.7	63.3	0.78	-0.510701	84	8.89405
NM_014593	chr18	-	46062710	46068690	46061855	46063363	1508	122	980	16.2	65	0.77	-0.423947	81.5	8.71472
NM_001728	chr19	+	523536	534493	528755	529441	686	61	490	17.8	71.4	0.71	-0.492345	80	8.94739
NM_198591	chr19	+	522324	534493	528755	529441	686	61	490	17.8	71.4	0.71	-0.492345	80	8.91607
NM_005035	chr19	-	568222	584568	566691	574505	7814	510	4829	13.1	61.8	0.68	-0.493089	82.1111	7.23867
NM_194460	chr19	-	598525	614227	602197	604193	1996	141	1349	14.1	67.6	0.62	-0.113466	82	7.75013
NM_002819	chr19	+	748391	763327	755218	757663	2445	202	1655	16.5	67.7	0.72	-0.70315	83.2	9.46864
NM_031991	chr19	+	748391	763327	755218	757663	2445	202	1655	16.5	67.7	0.72	-0.70315	83.2	9.47941
NM_002819	chr19	+	748391	763327	759004	759834	830	65	539	15.7	64.9	0.74	-0.497757	83	9.46864
NM_031991	chr19	+	748391	763327	759004	759834	830	65	539	15.7	64.9	0.74	-0.497757	83	9.47941
NM_002819	chr19	+	748391	763327	762904	764824	1920	213	1258	22.2	65.5	1.03	-2.04267	83	9.46864
NM_031991	chr19	+	748391	763327	762904	764824	1920	213	1258	22.2	65.5	1.03	-2.04267	83	9.47941
NM_005224	chr19	+	877036	923803	891723	893490	1767	130	1101	14.7	62.3	0.76	-0.227821	83.75	8.51905
NM_024100	chr19	+	935327	945569	942003	942386	383	32	266	16.7	69.5	0.69	-0.0447147	81	6.90788
NM_001033026	chr19	-	960649	972141	958551	963222	4671	350	3130	15	67	0.67	-0.376911	83	8.8381
NM_033420	chr19	-	960649	972141	958551	963222	4671	350	3130	15	67	0.67	-0.376911	83	7.92204
NM_001033026	chr19	-	960649	972141	965273	965578	305	30	211	19.7	69.2	0.83	-0.651476	83	8.8381
NM_033420	chr19	-	960649	972141	965273	965578	305	30	211	19.7	69.2	0.83	-0.651476	83	7.92204
NM_012292	chr19	+	1018173	1037627	1030682	1032937	2255	158	1527	14	67.7	0.61	-0.20704	83	7.47159
NM_014963	chr19	-	1058632	1125282	1069907	1071215	1308	93	886	14.2	67.7	0.63	-0.241247	81	6.14751
NM_014963	chr19	-	1058632	1125282	1091837	1092119	282	24	180	17	63.8	0.85	-0.325813	81	6.14751
NM_014963	chr19	-	1058632	1125282	1105023	1105486	463	48	344	20.7	74.3	0.77	-0.195979	81	6.14751
NM_014963	chr19	-	1058632	1125282	1108315	1109900	1585	115	1056	14.5	66.6	0.66	-0.698494	80.5	6.14751
NM_000455	chr19	+	1156797	1179434	1178531	1181256	2725	316	1793	23.2	65.8	1.07	-0.357447	83.5	7.69037
NM_032853	chr19	+	1305975	1329430	1311038	1311347	309	23	180	14.9	58.3	0.88	-0.0300601	85	6.45289
NM_032853	chr19	+	1305975	1329430	1327554	1328568	1014	65	605	12.8	59.7	0.72	-0.766516	83.75	6.45289
NM_024407	chr19	+	1334882	1346588	1338527	1339009	482	32	316	13.3	65.6	0.64	-0.17946	83	7.37091
NM_024407	chr19	+	1334882	1346588	1341693	1342304	611	55	413	18	67.6	0.79	-0.478414	84	7.37091
NM_018959	chr19	+	1358583	1386682	1374752	1375006	254	21	166	16.5	65.4	0.78	-0.217588	84	8.91069
NM_170711	chr19	+	1358583	1386682	1374752	1375006	254	21	166	16.5	65.4	0.78	-0.217588	84	8.22806
NM_018959	chr19	+	1358583	1386682	1379803	1380303	500	38	339	15.2	67.8	0.66	-0.241331	85	8.91069
NM_170711	chr19	+	1358583	1386682	1379803	1380303	500	38	339	15.2	67.8	0.66	-0.241331	85	8.22806
NM_003926	chr19	-	1527677	1543652	1528467	1529509	1042	70	677	13.4	65	0.64	-0.658013	84	7.85131
NM_003926	chr19	-	1527677	1543652	1535445	1536247	802	89	549	22.2	68.5	0.95	-0.674746	83	7.85131
NM_003200	chr19	-	1560292	1603326	1597117	1597713	596	40	397	13.4	66.6	0.61	-0.0753549	82	7.80008
NM_020695	chr19	-	1766244	1799452	1777829	1779546	1717	117	1116	13.6	65	0.65	-0.00393871	84	6.81502
NM_079834	chr19	+	1856372	1877012	1862923	1864406	1483	157	1083	21.2	73	0.8	-0.0265636	81	6.99235
NM_001319	chr19	+	1892160	1932336	1912001	1912325	324	26	225	16	69.4	0.69	-0.0746637	84	7.85214
NM_001319	chr19	+	1892160	1932336	1920438	1921136	698	53	468	15.2	67	0.68	-0.218426	84	7.85214
NM_001319	chr19	+	1892160	1932336	1929370	1930984	1614	123	975	15.2	60.4	0.84	-0.479852	84	7.85214
NM_017572	chr19	-	1988469	2002243	1989292	1989691	399	31	274	15.5	68.7	0.68	-0.13138	80	8.5902
NM_199054	chr19	-	1988469	2002243	1989292	1989691	399	31	274	15.5	68.7	0.68	-0.13138	80	8.972
NM_130807	chr19	-	2022034	2047269	2027483	2027982	499	43	327	17.2	65.5	0.8	-0.109476	82	10.1249
NM_130807	chr19	-	2022034	2047269	2029162	2029511	349	31	224	17.8	64.2	0.86	-0.0757257	82	10.1249
NM_003938	chr19	-	2051993	2102556	2066261	2066783	522	40	324	15.3	62.1	0.8	-0.249651	82	8.05056
NM_003938	chr19	-	2051993	2102556	2082292	2082881	589	61	413	20.7	70.1	0.84	-0.667611	83	8.05056
NM_032482	chr19	+	2115147	2183577	2177193	2179342	2149	176	1395	16.4	64.9	0.78	-0.399137	83	6.87867
NM_152988	chr19	+	2279628	2306100	2285495	2285771	276	22	191	15.9	69.2	0.67	-0.220149	82	6.52578
NM_152988	chr19	+	2279628	2306100	2302518	2302767	249	20	157	16.1	63.1	0.83	-0.0967669	80	6.52578
NM_032737	chr19	-	2379163	2407958	2383847	2386203	2356	153	1569	13	66.6	0.61	-0.319348	84	9.77911
NM_003021	chr19	-	2705711	2734354	2705545	2705938	393	34	254	17.3	64.6	0.83	-0.655816	86	9.28085
NM_003021	chr19	-	2705711	2734354	2712665	2712909	244	33	160	27	65.6	1.3	-0.251108	86	9.28085
NM_003249	chr19	+	2736505	2764599	2750493	2750974	481	36	315	15	65.5	0.71	-0.863776	85	7.20363
NM_005597	chr19	+	3317572	3414603	3403458	3403738	280	22	189	15.7	67.5	0.76	-0.454578	83	7.27324
NM_205843	chr19	+	3310615	3414603	3403458	3403738	280	22	189	15.7	67.5	0.76	-0.454578	83	7.76832
NM_031304	chr19	-	3441819	3451621	3442051	3443502	1451	109	933	15	64.3	0.73	-0.765806	83	7.95417
NM_012398	chr19	-	3581181	3651445	3588308	3588715	407	36	275	17.7	67.6	0.78	-0.305629	81	8.31585
NM_012398	chr19	-	3581181	3651445	3602790	3603134	344	35	236	20.3	68.6	0.87	-0.0614936	80	8.31585
NM_001348	chr19	-	3909451	3920826	3911981	3912241	260	24	173	18.5	66.5	0.83	-0.642846	84	7.26558
NM_001348	chr19	-	3909451	3920826	3915645	3915989	344	29	214	16.9	62.2	0.88	-0.0248608	84	7.26558
NM_015897	chr19	+	3958748	3989067	3988344	3989887	1543	113	930	14.6	60.3	0.81	-0.0492951	81	6.15587
NM_015898	chr19	-	3996215	4017816	3998754	3999428	674	60	399	17.8	59.2	1.02	-1.14675	82	8.7615
NM_015898	chr19	-	3996215	4017816	4004879	4006289	1410	153	919	21.7	65.2	1.02	-0.662609	82	8.7615
NM_030662	chr19	-	4041319	4075126	4041200	4041688	488	38	324	15.6	66.4	0.71	-0.453402	83	8.70934
NM_030662	chr19	-	4041319	4075126	4053299	4054041	742	55	519	14.8	69.9	0.61	-0.430938	83	8.70934
NM_152362	chr19	+	4590526	4606580	4603103	4603500	397	46	291	23.2	73.3	0.87	-0.0606335	82	6.36546
NM_139159	chr19	-	4626243	4674855	4633726	4634430	704	62	511	17.6	72.6	0.67	-0.0752623	83	8.08255
NM_013282	chr19	+	4861565	4913165	4883661	4884085	424	36	283	17	66.7	0.76	-0.533866	84	8.05063
NM_013282	chr19	+	4861565	4913165	4892521	4892981	460	38	304	16.5	66.1	0.76	-0.381664	84	8.05063
NM_013282	chr19	+	4861565	4913165	4895132	4895498	366	27	244	14.8	66.7	0.67	-0.43307	83	8.05063
NM_013282	chr19	+	4861565	4913165	4901670	4901940	270	20	174	14.8	64.4	0.74	-0.177058	84	8.05063
NM_015015	chr19	+	4920123	5104608	4983461	4984099	638	48	394	15	61.8	0.8	-0.348704	80	7.52391
NM_015015	chr19	+	4920123	5104608	5047559	5047857	298	36	215	24.2	72.1	0.97	-0.910316	82	7.52391
NM_015015	chr19	+	4920123	5104608	5061587	5061853	266	24	180	18	67.7	0.79	-0.264453	80	7.52391
NM_015015	chr19	+	4920123	5104608	5096816	5097296	480	39	318	16.2	66.2	0.79	-0.0848675	79	7.52391
NM_014649	chr19	-	5538009	5573938	5544709	5545194	485	54	334	22.3	68.9	0.96	-0.24362	79	8.89937
NM_005934	chr19	-	6161391	6230959	6162767	6164128	1361	94	909	13.8	66.8	0.62	-0.811421	81	7.76783
NM_005934	chr19	-	6161391	6230959	6166147	6166566	419	33	282	15.8	67.3	0.7	-0.518225	82	7.76783
NM_006087	chr19	-	6445329	6453330	6446192	6447225	1033	85	660	16.5	63.9	0.81	-0.600587	81	9.24011
NM_000208	chr19	-	7063265	7245011	7218384	7218688	304	23	163	15.1	53.6	1.05	-0.263149	84	7.86945
NM_015318	chr19	+	7365998	7443370	7410923	7411186	263	31	178	23.6	67.7	1.03	-0.0366218	83	7.67189
NM_006702	chr19	+	7505037	7532653	7520785	7521998	1213	86	784	14.2	64.6	0.68	-0.347145	82	8.08692
NM_006702	chr19	+	7505037	7532653	7525492	7526636	1144	91	789	15.9	69	0.68	-0.188886	81	8.08692
NM_006702	chr19	+	7505037	7532653	7527639	7528262	623	57	419	18.3	67.3	0.82	-0.295067	81	8.08692
NM_004218	chr19	+	8361204	8375317	8374304	8374944	640	56	450	17.5	70.3	0.72	-0.373335	84.25	8.82317
NM_032370	chr19	-	8482216	8485048	8481818	8482825	1007	90	694	17.9	68.9	0.76	-0.202539	84	6.12557
NM_003331	chr19	-	10322203	10352248	10324626	10325378	752	58	515	15.4	68.5	0.69	-0.213224	80	9.08569
NM_012289	chr19	-	10457795	10474481	10463280	10463878	598	60	397	20.1	66.4	0.91	-0.112191	84	8.80179
NM_003072	chr19	+	10932597	11033958	11005458	11005853	395	38	265	19.2	67.1	0.86	-0.0875643	85	9.61598
NM_000528	chr19	-	12618321	12638591	12628749	12628980	231	21	150	18.2	64.9	0.86	-0.613936	83	9.62437
NM_002741	chr19	+	14405165	14443679	14412998	14413255	257	23	188	17.9	73.2	0.67	-0.134669	82	8.97147
NM_005858	chr19	-	15325334	15351603	15344626	15345144	518	43	354	16.6	68.3	0.71	-0.561466	83	8.15518
NM_006387	chr19	-	16489699	16514263	16490929	16491156	227	20	148	17.6	65.2	0.84	-0.463826	84	8.21325
NM_032207	chr19	+	16468204	16493163	16490929	16491156	227	20	148	17.6	65.2	0.84	-0.463826	84	6.14853
NM_006387	chr19	-	16489699	16514263	16496980	16497637	657	57	469	17.4	71.4	0.7	-1.97323	85	8.21325
NM_006387	chr19	-	16489699	16514263	16504273	16504599	326	26	215	16	66	0.74	-0.00178218	84	8.21325
NM_015260	chr19	+	16801217	16852164	16850009	16850700	691	54	477	15.6	69	0.66	-0.293316	78	6.19591
NM_004145	chr19	+	17047590	17185104	17073479	17074332	853	60	540	14.1	63.3	0.7	-0.476415	84	7.74881
NM_173544	chr19	+	17495109	17525648	17510987	17512384	1397	123	944	17.6	67.6	0.78	-0.0831337	85	7.2059
NM_018174	chr19	+	17691302	17706324	17697755	17699816	2061	165	1443	16	70	0.66	-0.128289	83.6667	6.88154
NM_000215	chr19	-	17796592	17819841	17803061	17803567	506	41	330	16.2	65.2	0.77	-1.07133	83	6.82406
NM_000215	chr19	-	17796592	17819841	17813196	17814474	1278	88	854	13.8	66.8	0.64	-0.150521	83	6.82406
NM_005027	chr19	+	18125015	18142343	18132738	18133232	494	49	368	19.8	74.5	0.72	-0.125262	83	6.48102
NM_018316	chr19	+	18608837	18642302	18639485	18641041	1556	144	1027	18.5	66	0.85	-0.0602402	84	7.27163
NM_002911	chr19	+	18803743	18840039	18826635	18827085	450	38	292	16.9	64.9	0.8	-0.440153	84	7.83048
NM_017660	chr19	+	19357641	19480741	19472938	19473307	369	26	247	14.1	66.9	0.63	-0.885434	84	7.94837
NM_017660	chr19	+	19357641	19480741	19473716	19473928	212	23	141	21.7	66.5	0.99	-0.162911	84	7.94837
NM_024310	chr19	+	34848166	34858223	34856608	34857396	788	75	533	19	67.6	0.83	-0.486563	81	6.49404
NM_032139	chr19	-	37779746	37857942	37788308	37788544	236	16	156	13.6	66.1	0.62	-0.260264	67	8.4963
NM_003367	chr19	+	40451735	40462558	40461383	40462037	654	47	428	14.4	65.4	0.67	-0.354153	83	9.57768
NM_207291	chr19	+	40451735	40462558	40461383	40462037	654	47	428	14.4	65.4	0.67	-0.354153	83	9.69519
NM_015073	chr19	+	43089707	43390848	43264488	43265592	1104	107	763	19.4	69.1	0.81	-0.479206	78	9.10837
NM_002698	chr19	-	47284505	47328470	47291347	47292362	1015	69	681	13.6	67.1	0.6	-0.38759	84	9.03992
NM_133444	chr19	+	47416331	47424193	47421256	47422201	945	63	610	13.3	64.6	0.66	-0.490272	83.5	6.43232
NM_005178	chr19	+	49943817	49955141	49952192	49953649	1457	124	997	17	68.4	0.73	-0.0639814	84	6.11356
NM_004943	chr19	-	50978103	50987900	50980828	50981774	946	74	663	15.6	70.1	0.64	-0.288378	83	7.77747
NM_016457	chr19	-	51869412	51912224	51873523	51873733	210	18	129	17.1	61.4	0.91	-0.446165	83	8.40778
NM_016457	chr19	-	51869412	51912224	51888978	51889240	262	19	175	14.5	66.8	0.65	-0.299079	81	8.40778
NM_001039885	chr19	+	51941142	51953672	51950649	51952064	1415	151	999	21.3	70.6	0.86	-0.704208	83	8.20696
NM_015711	chr19	+	52803264	52898346	52874915	52876213	1298	113	915	17.4	70.5	0.72	-0.0683881	79	6.69882
NM_001040031	chr19	+	54530488	54535673	54532999	54533440	441	32	291	14.5	66	0.73	-0.0892522	84	10.0337
NM_015953	chr19	-	54750779	54775615	54751386	54751987	601	51	409	17	68.1	0.74	-0.224646	83	7.24889
NM_021228	chr19	+	54837193	54853717	54846343	54848103	1760	186	1151	21.1	65.4	0.99	-0.0326553	84	8.94942
NM_007254	chr19	-	55056272	55062630	55056647	55058098	1451	103	955	14.2	65.8	0.66	-0.659208	84	7.26395
NM_002691	chr19	+	55579404	55613083	55597289	55597881	592	48	407	16.2	68.8	0.69	-0.308876	82	7.97525
NM_001013	chr19	+	59396537	59403327	59402918	59403187	269	21	174	15.6	64.7	0.75	-0.0993909	84	10.1596
NM_013301	chr19	+	60850765	60856338	60855474	60859069	3595	298	2042	16.6	56.8	1.03	-0.476887	77	6.77507
NM_013333	chr19	+	60878372	60898945	60888478	60888931	453	49	312	21.6	68.9	0.91	-0.0275661	75	8.06937
NM_001002836	chr19	-	61290543	61324461	61300603	61300915	312	25	183	16	58.7	0.93	-0.684018	63	7.65554
NM_014347	chr19	+	63670274	63676577	63674141	63675324	1183	109	794	18.4	67.1	0.82	-0.259255	81	7.55282
NM_032792	chr19	-	63716708	63722733	63720164	63720751	587	59	398	20.1	67.8	0.88	-0.399136	84	7.7551
NM_016030	chr2	+	3362452	3462349	3370409	3371507	1098	117	746	21.3	67.9	0.93	-0.39291	69.5	7.79855
NM_022893	chr2	-	60537832	60634137	60541326	60542496	1170	105	730	17.9	62.4	0.92	-0.175882	77	6.92716
NM_001004720	chr2	+	105834736	105877160	105864219	105865009	790	78	522	19.7	66.1	0.91	-0.212117	72	7.75947
NM_001004722	chr2	+	105727785	105877160	105864219	105865009	790	78	522	19.7	66.1	0.91	-0.212117	72	7.90752
NM_001004720	chr2	+	105834736	105877160	105875959	105876427	468	39	303	16.7	64.7	0.8	-0.608846	72	7.75947
NM_001004722	chr2	+	105727785	105877160	105875959	105876427	468	39	303	16.7	64.7	0.8	-0.608846	72	7.90752
NM_024506	chr2	-	219809746	219818375	219816088	219816592	504	40	301	15.9	59.7	0.89	-0.82439	85	6.39069
NM_023083	chr2	+	241174817	241187193	241178635	241179018	383	28	236	14.6	61.6	0.77	-0.175961	73	6.31018
NM_023085	chr2	+	241174817	241187193	241178635	241179018	383	28	236	14.6	61.6	0.77	-0.175961	73	6.35942
NM_015963	chr2	-	242172493	242225398	242220984	242221375	391	29	254	14.8	65	0.71	-0.556868	87	8.62832
NM_013325	chr2	+	242225699	242261944	242254751	242255233	482	36	306	14.9	63.5	0.74	-0.0607287	83	6.50055
NM_032329	chr2	+	242290128	242317569	242312880	242313827	947	89	631	18.8	66.6	0.85	-1.26613	82	6.1368
NM_006698	chr20	-	35579233	35589747	35582017	35583550	1533	120	929	15.7	60.6	0.86	-0.737535	84.375	8.56147
NM_020820	chr20	-	46674199	46877827	46714704	46715050	346	25	194	14.5	56.1	1	-0.954619	85	7.85098
NM_012340	chr20	-	49441171	49592665	49573097	49573947	850	74	586	17.4	68.9	0.75	-1.20199	78	9.11225
NM_173091	chr20	-	49441171	49592665	49573097	49573947	850	74	586	17.4	68.9	0.75	-1.20199	78	9.21439
NM_001033521	chr20	+	54400833	54412989	54411931	54412178	247	20	144	16.2	58.3	0.96	-0.472816	72	9.49308
NM_003185	chr20	-	59983248	60074261	59987862	59988987	1125	87	756	15.5	67.2	0.69	-0.687654	65.5	7.08207
NM_015666	chr20	+	60191475	60211205	60209137	60209547	410	30	249	14.6	60.7	0.79	-0.950681	83	6.3471
NM_031215	chr20	-	60397080	60415734	60403162	60403506	344	25	231	14.5	67.2	0.65	-0.365136	81	7.04353
NM_016354	chr20	+	60744241	60774092	60758442	60758925	483	42	325	17.4	67.3	0.77	-0.145346	84	7.64525
NM_033081	chr20	-	60979534	61039719	60982666	60984152	1486	98	951	13.2	64	0.64	-0.549653	84	6.46455
NM_018209	chr20	+	61374609	61391587	61389469	61390248	779	56	501	14.4	64.3	0.7	-0.478795	83	8.65993
NM_001037335	chr20	-	61659882	61676036	61664410	61669429	5019	381	3418	15.2	68.1	0.66	-0.0548908	82	6.59241
NM_012384	chr20	-	61689398	61728825	61691778	61692500	722	54	505	15	69.9	0.61	-0.0216578	85	6.63109
NM_012384	chr20	-	61689398	61728825	61693674	61694049	375	27	239	14.4	63.7	0.71	-0.66456	84	6.63109
NM_025219	chr20	+	61996961	62035839	62021157	62021967	810	72	573	17.8	70.7	0.71	-0.0690762	84	8.09495
NM_017859	chr20	-	62041631	62058212	62046168	62046496	328	25	222	15.2	67.7	0.67	-0.167095	84	7.10184
NM_012469	chr20	+	62082874	62134897	62131405	62131796	391	28	252	14.3	64.5	0.69	-0.781647	84	9.53961
NM_022115	chr21	-	42094393	42172660	42094543	42094911	368	24	226	13	61.4	0.74	-0.568607	80	7.67533
NM_173354	chr21	-	43658826	43671430	43661158	43661635	477	40	347	16.8	72.7	0.65	-0.0259666	83	6.91051
NM_015056	chr21	+	43903859	43940388	43938389	43938692	303	21	189	13.9	62.4	0.76	-0.261157	85	8.75055
NM_001037553	chr21	+	44169706	44231903	44187901	44188227	326	24	217	14.7	66.6	0.68	-1.12621	83	6.89469
NM_001037553	chr21	+	44169706	44231903	44226912	44227270	358	28	219	15.6	61.2	0.84	-0.235713	84	6.89469
NM_000211	chr21	-	45130296	45165393	45148088	45148380	292	21	191	14.4	65.4	0.69	-0.206897	77	8.79697
NM_032261	chr21	-	46405490	46428801	46404920	46406493	1573	153	1074	19.5	68.3	0.83	-0.143048	65.75	6.66385
NM_006031	chr21	+	46568463	46690110	46633099	46633549	450	34	294	15.1	65.3	0.71	-0.258319	69	7.86375
NM_006031	chr21	+	46568463	46690110	46655961	46656359	398	35	275	17.6	69.1	0.74	-0.616833	65	7.86375
NM_001535	chr21	+	46879954	46909291	46892945	46893236	291	24	182	16.5	62.5	0.89	-0.0760757	79	7.6517
NM_001535	chr21	+	46879954	46909291	46905669	46906277	608	55	400	18.1	65.8	0.84	-0.950809	82	7.6517
NM_022720	chr22	+	18447833	18479400	18453363	18453931	568	38	334	13.4	58.8	0.77	-1.37677	83	7.50464
NM_015094	chr22	+	20101692	20135750	20130412	20131052	640	48	411	15	64.2	0.73	-0.148294	82	6.31125
NM_020437	chr22	+	25155279	25170978	25159718	25160128	410	30	266	14.6	64.9	0.72	-0.355318	84	7.73777
NM_002473	chr22	-	35007269	35114009	35048396	35048706	310	24	208	15.5	67.1	0.69	-0.303983	85	9.41181
NM_001013436	chr22	+	35745647	35755809	35750171	35750846	675	89	483	26.4	71.6	1.03	-0.228008	84	6.39623
NM_021126	chr22	+	35745647	35755809	35750171	35750846	675	89	483	26.4	71.6	1.03	-0.228008	84	6.42996
NM_001051	chr22	-	35932190	35938299	35932947	35933699	752	65	508	17.3	67.6	0.76	-0.76887	84	6.39214
NM_014292	chr22	-	37590193	37598204	37592284	37593157	873	82	581	18.8	66.6	0.88	-0.2619	85	8.32266
NM_015140	chr22	-	41892571	41913051	41900005	41900266	261	21	176	16.1	67.4	0.72	-0.0224709	82	7.87718
NM_001009880	chr22	-	43966786	44015314	43977385	43977744	359	26	237	14.5	66	0.66	-0.60689	81	7.72589
NM_001001928	chr22	+	44925162	45018317	44988788	44989453	665	54	413	16.2	62.1	1.07	-0.0181145	82	6.90357
NM_014346	chr22	+	45537212	45948388	45633577	45635088	1511	102	919	13.5	60.8	0.74	-0.963587	84	8.56447
NM_014838	chr22	+	48633500	48669730	48665572	48666380	808	65	503	16.1	62.3	0.83	-1.31727	85	8.16319
NM_020461	chr22	-	48998244	49025527	48999607	49000064	457	34	307	14.9	67.2	0.68	-0.248941	85	6.24462
NM_020461	chr22	-	48998244	49025527	49001120	49001527	407	29	259	14.3	63.6	0.7	-0.258491	85	6.24462
NM_001953	chr22	-	49311047	49315380	49310474	49317634	7160	538	4511	15	63	0.76	-0.256346	82	6.15677
NM_014869	chr3	-	12913718	12983960	12915753	12916134	381	30	257	15.7	67.5	0.69	-0.177411	83	9.00328
NM_014869	chr3	-	12913718	12983960	12951966	12953182	1216	87	782	14.3	64.3	0.69	-0.0417606	85	9.00328
NM_014965	chr3	+	42176664	42229113	42218934	42219375	441	33	289	15	65.5	0.7	-0.157814	79	7.63654
NM_014966	chr3	+	47819402	47866689	47862829	47863154	325	23	215	14.2	66.2	0.65	-0.367457	83	8.4755
NM_032355	chr3	-	49921306	49942449	49922625	49923434	809	64	509	15.8	62.9	0.81	-0.0909434	84	6.59267
NM_007184	chr3	+	52464563	52502128	52496714	52497652	938	68	602	14.5	64.2	0.72	-0.971497	83	7.09311
NM_001457	chr3	+	57969166	58133022	58084140	58084409	269	24	171	17.8	63.6	0.89	-0.1931	84	8.60383
NM_015642	chr3	-	115539636	116348817	115552412	115553345	933	82	590	17.6	63.2	0.88	-0.431838	84	6.10484
NM_004526	chr3	+	128799942	128823968	128806144	128806725	581	44	384	15.1	66.1	0.71	-0.305217	84	9.17939
NM_198565	chr3	+	197851052	197873271	197871190	197871900	710	56	455	15.8	64.1	0.77	-0.119652	84.5	7.21095
NM_006315	chr4	+	689572	754427	714335	716070	1735	128	1213	14.8	69.9	0.61	-0.288585	83	6.97385
NM_006315	chr4	+	689572	754427	742029	743788	1759	186	1186	21.1	67.4	1.09	-0.112899	83	6.97385
NM_005255	chr4	-	833064	916174	877190	878164	974	63	642	12.9	65.9	0.61	-1.00655	79.1667	7.67937
NM_001004356	chr4	+	995609	1010686	1007524	1008938	1414	120	936	17	66.2	0.78	-0.284108	81	6.28176
NM_001012614	chr4	-	1195227	1232908	1208943	1209718	775	67	531	17.3	68.5	0.74	-0.184628	80	8.75793
NM_001017405	chr4	+	1273671	1323925	1312394	1312875	481	34	326	14.1	67.8	0.62	-0.53003	84	8.58026
NM_005663	chr4	-	1954240	1980757	1957290	1958058	768	54	521	14.1	67.8	0.61	-0.452877	82.5	8.59556
NM_002337	chr4	-	3484087	3504022	3489362	3489946	584	44	377	15.1	64.6	0.73	-1.82882	65	8.40066
NM_020773	chr4	+	6962395	7085746	7077664	7078067	403	28	252	13.9	62.5	0.72	-0.130441	82	7.69591
NM_019027	chr4	-	40120028	40212747	40134578	40135662	1084	118	713	21.8	65.8	1.01	-0.952056	85	9.35183
NM_025144	chr4	+	113437947	113583213	113552390	113552772	382	29	246	15.2	64.4	0.75	-0.912623	86	8.02056
NM_178835	chr4	-	146901337	147079057	146901960	146902267	307	24	195	15.6	63.5	0.79	-0.548501	85	7.9078
NM_006598	chr5	-	1103488	1165172	1126560	1127023	463	34	316	14.7	68.3	0.63	-0.452552	63	6.11672
NM_024830	chr5	-	1514541	1577076	1519074	1519457	383	28	239	14.6	62.4	0.75	-0.16861	77	9.12829
NM_007118	chr5	+	14196828	14562458	14540930	14541536	606	65	442	21.5	72.9	0.83	-0.596866	76	7.84146
NM_001750	chr5	+	96023696	96136141	96063965	96064640	675	57	407	16.9	60.3	0.93	-1.47968	87	9.18107
NM_052899	chr5	-	175955408	175969737	175956383	175957257	874	91	542	20.8	62	1.08	-0.0964511	80	7.9368
NM_022455	chr5	+	176493438	176659820	176625946	176626237	291	24	176	16.5	60.5	0.91	-0.25623	84	7.68332
NM_014275	chr5	-	179157204	179166558	179160889	179161609	720	65	488	18.1	67.8	0.79	-0.176826	73	6.30205
NM_018303	chr6	-	430137	638109	601409	602155	746	76	520	20.4	69.7	0.84	-0.121509	84	8.03445
NM_001069	chr6	-	3098900	3102782	3099103	3099745	642	58	416	18.1	64.8	0.86	-1.16544	84	9.15208
NM_178012	chr6	-	3169494	3172967	3169915	3170633	718	66	469	18.4	65.3	0.86	-1.1489	82	10.5378
NM_001003698	chr6	+	7053084	7197211	7174876	7175864	988	91	668	18.4	67.6	0.81	-0.000793071	84	7.59638
NM_001003698	chr6	+	7053084	7197211	7191664	7192571	907	82	621	18.1	68.5	0.78	-0.265465	83	7.59638
NM_004973	chr6	+	15354505	15630232	15604783	15605315	532	51	352	19.2	66.2	0.88	-0.294203	69	6.85567
NM_000332	chr6	-	16407321	16869700	16436148	16436542	394	30	267	15.2	67.8	0.66	-0.109154	84	7.88143
NM_002125	chr6	-	32593131	32605984	32597720	32598106	386	33	242	17.1	62.7	0.88	-0.157094	81	8.24708
NM_002224	chr6	+	33697138	33772326	33763944	33764216	272	20	175	14.7	64.3	0.72	-0.376261	84	7.70087
NM_002505	chr6	+	41148684	41178123	41176453	41177326	873	71	515	16.3	59	0.94	-1.12371	81	8.89063
NM_015076	chr6	-	111037873	111243105	111073704	111074516	812	74	524	18.2	64.5	0.88	-0.143361	85	7.83647
NM_003764	chr6	+	144513346	144554769	144549519	144550390	871	88	561	20.2	64.4	0.97	-0.813871	85	7.18587
NM_000876	chr6	+	160310120	160447573	160346254	160347492	1238	99	878	16	70.9	0.66	-0.350822	76	9.03345
NM_002735	chr7	-	555359	718687	579066	580265	1199	84	764	14	63.7	0.69	-0.0283444	79	8.07094
NM_017802	chr7	+	732863	792642	746765	747127	362	29	245	16	67.7	0.7	-0.36016	83	8.4537
NM_017802	chr7	+	732863	792642	760743	761108	365	28	240	15.3	65.8	0.71	-0.965003	81	8.4537
NM_017802	chr7	+	732863	792642	773862	774787	925	79	626	17.1	67.7	0.81	-0.437365	80	8.4537
NM_017802	chr7	+	732863	792642	788215	789160	945	131	626	27.7	66.2	1.29	-0.559385	81	8.4537
NM_015949	chr7	+	882716	902597	897439	897741	302	26	213	17.2	70.5	0.7	-0.298507	80.5	7.55017
NM_015949	chr7	+	882716	902597	901557	902174	617	56	421	18.2	68.2	0.78	-0.681045	80	7.55017
NM_006869	chr7	-	904062	960815	910091	910418	327	23	217	14.1	66.4	0.67	-0.067066	79	6.59144
NM_001039966	chr7	+	1092968	1099977	1098151	1099713	1562	106	984	13.6	63	0.69	-0.245559	83	6.31945
NM_001013836	chr7	-	1821953	2239109	1875065	1875329	264	24	183	18.2	69.3	0.76	-0.0736765	77	7.52079
NM_001013836	chr7	-	1821953	2239109	1974328	1974794	466	35	296	15	63.5	0.77	-0.117904	73	7.52079
NM_018641	chr7	+	2409784	2440742	2438771	2440093	1322	130	870	19.7	65.8	0.91	-0.5656	85	6.76663
NM_032172	chr7	+	6111075	6167720	6159939	6161203	1264	141	908	22.3	71.8	0.87	-0.332799	84	7.82874
NM_024067	chr7	+	6596439	6614880	6613409	6614481	1072	87	748	16.2	69.8	0.67	-0.920613	85	9.10959
NM_006060	chr7	+	50314923	50440292	50435060	50435894	834	79	545	18.9	65.3	0.9	-0.460661	83	8.89211
NM_015570	chr7	+	68701841	69895821	69698770	69699392	622	64	395	20.6	63.5	1.02	-0.226019	64	7.639
NM_015570	chr7	+	68701841	69895821	69892830	69893922	1092	92	724	16.8	66.3	0.78	-0.31467	67	7.639
NM_012453	chr7	-	72621209	72630949	72622926	72623144	218	18	141	16.5	64.7	0.79	-0.171293	80	9.01674
NM_003496	chr7	+	98314048	98448802	98447605	98447995	390	28	242	14.4	62.1	0.75	-0.230336	73	8.95645
NM_001913	chr7	+	101246011	101713970	101625451	101626317	866	66	547	15.2	63.2	0.77	-0.243724	82	7.24294
NM_181552	chr7	+	101247601	101680064	101625451	101626317	866	66	547	15.2	63.2	0.77	-0.243724	82	6.3427
NM_001913	chr7	+	101246011	101713970	101669314	101669715	401	29	262	14.5	65.3	0.68	-0.044175	85.5	7.24294
NM_181552	chr7	+	101247601	101680064	101669314	101669715	401	29	262	14.5	65.3	0.68	-0.044175	85.5	6.3427
NM_001913	chr7	+	101246011	101713970	101678385	101679354	969	105	678	21.7	70	0.89	-0.248696	84	7.24294
NM_181552	chr7	+	101247601	101680064	101678385	101679354	969	105	678	21.7	70	0.89	-0.248696	84	6.3427
NM_002649	chr7	+	106293159	106334828	106295293	106295969	676	58	438	17.2	64.8	0.82	-0.218101	81	6.33952
NM_152411	chr7	-	148397665	148418802	148398893	148400123	1230	87	815	14.1	66.3	0.64	-0.0976166	85	7.64457
NM_003575	chr7	+	148523509	148554272	148553842	148554128	286	22	187	15.4	65.4	0.73	-0.033967	84	7.48556
NM_015694	chr7	-	148759386	148788986	148759804	148760827	1023	101	684	19.7	66.9	0.9	-0.433767	84	6.04598
NM_152557	chr7	-	148800816	148825831	148802311	148802936	625	60	394	19.2	63	0.98	-0.474621	78	8.4452
NM_013400	chr7	+	149696811	149702066	149699689	149700984	1295	129	862	19.9	66.6	0.91	-0.100246	83	8.66015
NM_173680	chr7	+	149707338	149726652	149724569	149726162	1593	150	1059	18.8	66.5	0.86	-0.127966	84	6.35978
NM_004225	chr8	-	8679408	8788541	8786062	8788888	2826	197	1642	13.9	58.1	0.83	-0.0647077	84	6.86447
NM_030958	chr8	-	70747123	70909853	70906652	70909995	3343	235	2023	14.1	60.5	0.77	-0.713888	74	8.80227
NM_012154	chr8	-	141610445	141714828	141614703	141614931	228	18	143	15.8	62.7	0.8	-0.943976	81	8.45848
NM_024736	chr8	+	144711619	144716372	144713752	144714275	523	46	382	17.6	73	0.66	-0.0529374	79	7.71061
NM_003313	chr8	-	144765930	144770875	144767471	144767951	480	34	323	14.2	67.3	0.63	-0.268001	82	8.84927
NM_198488	chr8	-	144878090	144887902	144880209	144882966	2757	297	1966	21.5	71.3	0.85	-0.712962	84	6.51384
NM_015356	chr8	-	144945077	144969537	144959099	144959650	551	47	395	17.1	71.7	0.67	-0.0318733	85.5	7.06628
NM_000445	chr8	-	145061308	145122901	145062258	145074123	11865	951	7914	16	66.7	0.73	-0.441666	82.5417	6.78807
NM_013291	chr8	-	145589253	145605541	145587622	145590683	3061	207	1990	13.5	65	0.65	-0.312374	82	8.25351
NM_003070	chr9	+	2005341	2183623	2037212	2037801	589	39	344	13.2	58.4	0.78	-0.830726	83	10.0243
NM_139045	chr9	+	2005341	2183623	2037212	2037801	589	39	344	13.2	58.4	0.78	-0.830726	83	9.98544
NM_004972	chr9	+	4975244	5118182	5030734	5031922	1188	85	742	14.3	62.5	0.73	-0.572676	83	6.37761
NM_004972	chr9	+	4975244	5118182	5100784	5102274	1490	107	1007	14.4	67.6	0.63	-0.491362	83	6.37761
NM_016734	chr9	-	36828530	37024476	37016222	37018014	1792	159	1213	17.7	67.7	0.78	-0.164858	83	6.87551
NM_001003800	chr9	-	94513465	94566904	94520666	94521407	741	54	491	14.6	66.3	0.66	-1.03926	82	7.88945
NM_015651	chr9	-	122657751	122679427	122670927	122671493	566	51	414	18	73.1	0.71	-0.00424241	85	9.59369
NM_005489	chr9	-	129540416	129573442	129556228	129557670	1442	120	976	16.6	67.7	0.73	-0.0936238	84	7.14527
NM_170600	chr9	-	129540416	129580869	129556228	129557670	1442	120	976	16.6	67.7	0.73	-0.0936238	84	6.88752
NM_013443	chr9	-	129687421	129701692	129692747	129692981	234	19	149	16.2	63.7	0.8	-0.315604	85	7.6609
NM_175039	chr9	-	129709985	129719126	129714367	129714779	412	34	270	16.5	65.5	0.77	-0.01821	85	6.9984
NM_175040	chr9	-	129709985	129719126	129714367	129714779	412	34	270	16.5	65.5	0.77	-0.01821	85	7.0362
NM_019594	chr9	+	130684211	130720138	130709703	130710913	1210	80	715	13.2	59.1	0.76	-1.07947	84	6.36407
NM_001008563	chr9	+	131637577	131683928	131670145	131670644	499	40	334	16	66.9	0.73	-0.444931	81	6.84776
NM_006676	chr9	+	131637516	131683928	131670145	131670644	499	40	334	16	66.9	0.73	-0.444931	81	6.46351
NM_005157	chr9	+	132700651	132752879	132750241	132750700	459	34	301	14.8	65.6	0.7	-0.546536	82	8.15532
NM_007313	chr9	+	132579088	132752883	132750241	132750700	459	34	301	14.8	65.6	0.7	-0.546536	82	8.39801
NM_033387	chr9	-	133123285	133141727	133126033	133126259	226	17	155	15	68.6	0.65	-0.0384428	82	7.50418
NM_031432	chr9	-	133389004	133396483	133394138	133394381	243	24	164	19.8	67.5	0.87	-0.028474	84	7.26016
NM_015447	chr9	-	137840153	137938826	137849597	137850920	1323	104	822	15.7	62.1	0.83	-0.350366	63.5	7.76011
NM_181701	chr9	-	138238003	138277508	138268237	138268473	236	18	151	15.3	64	0.75	-0.399389	83	9.19793
NM_001039707	chr9	-	138416194	138424875	138421361	138421668	307	27	197	17.6	64.2	0.86	-0.289907	83.5	7.92171
NM_015160	chr9	+	138424936	138438034	138437283	138438352	1069	72	653	13.5	61.1	0.73	-0.493734	82	8.88571
NM_017617	chr9	-	138508716	138560059	138516026	138516861	835	65	581	15.6	69.6	0.65	-0.563012	80	8.09658
NM_017617	chr9	-	138508716	138560059	138518861	138520209	1348	111	931	16.5	69.1	0.69	-0.0543968	81	8.09658
NM_017617	chr9	-	138508716	138560059	138520699	138521390	691	57	475	16.5	68.7	0.7	-0.13403	81	8.09658
NM_017617	chr9	-	138508716	138560059	138528766	138529066	300	22	200	14.7	66.7	0.66	-0.44308	80	8.09658
NM_021138	chr9	+	138900785	138940888	138922238	138922645	407	33	271	16.2	66.6	0.73	-0.248656	85	7.65475
NM_021138	chr9	+	138900785	138940888	138923825	138924158	333	24	225	14.4	67.6	0.64	-0.541839	85	7.65475
NM_018998	chr9	-	138954707	138958994	138955237	138959261	4024	303	2684	15.1	66.7	0.68	-0.396926	83.5	7.92338
NM_013366	chr9	-	139189056	139202878	139199150	139199585	435	36	299	16.6	68.7	0.7	-0.246263	83.5	7.19787
NM_017723	chr9	+	139292100	139296914	139292434	139295926	3492	344	2451	19.7	70.2	0.8	-0.402974	84	8.12124
NM_024757	chr9	+	139633264	139850397	139802941	139803595	654	59	447	18	68.3	0.78	-0.564567	75	8.11065
NM_024757	chr9	+	139633264	139850397	139828673	139828887	214	19	139	17.8	65	0.84	-0.167816	73	8.11065
NM_024757	chr9	+	139633264	139850397	139848299	139849717	1418	132	961	18.6	67.8	0.81	-0.951313	71	8.11065
NM_002183	chrX	+	1415508	1461582	1431067	1431357	290	27	182	18.6	62.8	0.95	-0.0222817	74	9.07245
NM_004192	chrX	-	1482031	1531844	1517953	1518352	399	35	250	17.5	62.7	0.91	-0.147189	71	9.47589
NM_178129	chrX	-	1541467	1616037	1544434	1545573	1139	103	739	18.1	64.9	0.87	-0.715539	75	8.62671
NM_005088	chrX	+	1670485	1681411	1677005	1680627	3622	252	2391	13.9	66	0.64	-0.303024	81.375	9.44142
NM_004729	chrX	-	2414454	2429008	2416770	2418703	1933	133	1226	13.8	63.4	0.69	-0.811658	74	7.75799
NM_145177	chrX	-	2147552	2429015	2416770	2418703	1933	133	1226	13.8	63.4	0.69	-0.811658	74	6.16346
